# Supplementary material for: An overview of systematic reviews of economic evaluations of pharmacy-based public health interventions: addressing methodological challenges
Source: PubMed Central journal article supplement (PMC6844055; doi:10.1186/s13643-019-1177-3), 2019-11-11
Supplement: 13643_2019_1177_MOESM5_ESM.pdf [file 13643_2019_1177_MOESM5_ESM.pdf]

## An Overview of Systematic Reviews of Economic Evaluations of Pharmacy-Based Public Health Interventions: Addressing Methodological Challenges

### Additional File 5: Quality of included reviews in all 16 items (AMSTAR 2)

| No. | AMSTAR 2 Item                                                                                                      | Yes                                                  | Partial Yes                                          | No meta-analysis                                 | n (%)     | Critical domains |
|-----|--------------------------------------------------------------------------------------------------------------------|------------------------------------------------------|------------------------------------------------------|--------------------------------------------------|-----------|------------------|
| 1   | Research question and inclusion criteria include components of PICO                                                | All                                                  | -                                                    | -                                                | 14 (100%) | -                |
| 2   | Explicit statement – review methods established prior to review and justification for deviations from protocol     | [50, 55]                                             | -                                                    | -                                                | 2 (14%)   | ●                |
| 3   | Explained selection of study designs for inclusion                                                                 | [44, 45, 46, 48, 49, 24, 50, 51, 52, 53, 54, 55]     | -                                                    | -                                                | 12 (86%)  | -                |
| 4   | Used comprehensive literature search strategy                                                                      | [50]                                                 | [44, 45, 46, 47, 48, 49, 24, 51, 52, 53, 54, 55, 56] | -                                                | 14 (100%) | ●                |
| 5   | Performed study selection in duplicate                                                                             | [44, 45, 46, 47, 48, 49, 50, 51, 53, 54, 55, 56]     | -                                                    | -                                                | 12 (86%)  | -                |
| 6   | Performed data extraction in duplicate                                                                             | [44, 45, 46, 47, 48, 50, 53, 55]                     | -                                                    | -                                                | 8 (57%)   | -                |
| 7   | Provided list of excluded studies and justification for exclusions                                                 | -                                                    | -                                                    | -                                                | 0 (0%)    | ●                |
| 8   | Described included studies in adequate detail                                                                      | [49, 24, 50, 51, 52, 53]                             | [44, 45, 46, 47, 48, 54, 55]                         | -                                                | 13 (93%)  | -                |
| 9   | Used satisfactory technique for assessing risk of bias in individual studies included in review                    | [50, 54, 55]                                         | [24, 56]                                             | -                                                | 5 (36%)   | (1)              |
| 10  | Reported on the sources of funding for the studies included in the review                                          | [48, 50]                                             | -                                                    | -                                                | 2 (14%)   | -                |
| 11  | Used appropriate methods for statistical combination of results if meta-analysis performed                         | [50, 54]                                             | -                                                    | [44, 45, 46, 47, 48, 49, 24, 51, 52, 53, 55, 56] | 2 (100%)  | (2)              |
| 12  | Assessed potential impact of risk of bias in individual studies on the results of meta-analysis or other synthesis | [50]                                                 | -                                                    | [44, 45, 46, 47, 48, 49, 24, 51, 52, 53, 55, 56] | 1 (50%)   | -                |
| 13  | Accounted for risk of bias in individual studies when interpreting/discussing results of review                    | [45, 46, 48, 49, 24, 50, 53, 54, 55, 56]             | -                                                    | -                                                | 10 (71%)  | ●                |
| 14  | Provided satisfactory explanation/discussion of any heterogeneity observed in results of review                    | [44, 45, 46, 48, 49, 24, 50, 51, 53, 55]             | -                                                    | -                                                | 10 (71%)  | -                |
| 15  | Carried out adequate investigation of publication bias and discussed impact on the results of review               | [50]                                                 | -                                                    | [44, 45, 46, 47, 48, 49, 24, 51, 52, 53, 55, 56] | 1 (50%)   | (3)              |
| 16  | Reported potential sources of conflict of interest, including funding received for conducting the review           | [44, 45, 46, 47, 48, 49, 24, 50, 51, 53, 54, 55, 56] | -                                                    | -                                                | 13 (93%)  | -                |

(1) Not considered: instruments for reviews that include nonrandomized trials were published in 2016 (ROBINS-I) and 2017 (Suggested Risk of Bias criteria for EPOC Reviews) only

(2) Not considered: most reviews are narrative

(3) Not considered: included reviews have in average 8 studies (<10)
