# Supplementary material for: An overview of systematic reviews of economic evaluations of pharmacy-based public health interventions: addressing methodological challenges
Source: Springer Nature journal article supplement (doi:10.1186/s13643-019-1177-3), 2019-11-11
Supplement: MOESM3 [file 17374664]

## An Overview of Systematic Reviews of Economic Evaluations of Pharmacy-Based Public Health Interventions: Addressing Methodological Challenges

**Additional File 3:** List of excluded reviews (n=702, after removing 45 initial duplicates)

| ID  | Database       | Title                                                                                                                                                                                                                                                                                                                                         |
|-----|----------------|-----------------------------------------------------------------------------------------------------------------------------------------------------------------------------------------------------------------------------------------------------------------------------------------------------------------------------------------------|
| #1  | MEDLINE_EMBASE | Pharmaceutical services as a tool to improve outcomes in patients with cardiovascular diseases.                                                                                                                                                                                                                                               |
| #2  | MEDLINE_EMBASE | A systematic review of evidence-based community pharmacy services aimed at the prevention of cardiovascular disease.                                                                                                                                                                                                                          |
| #3  | MEDLINE_EMBASE | Effectiveness of pharmaceutical care in medicated hypertensive patients: AFPRES CLM Study.                                                                                                                                                                                                                                                    |
| #4  | MEDLINE_EMBASE | Pharmacist-led interventions to reduce unplanned admissions for older people: A systematic review and meta-analysis of randomised controlled trials.                                                                                                                                                                                          |
| #5  | MEDLINE_EMBASE | Specialty pharmacy services: Preparing for a New Era in health-system pharmacy.                                                                                                                                                                                                                                                               |
| #6  | MEDLINE_EMBASE | Cluster randomized trials for pharmacy practice research.                                                                                                                                                                                                                                                                                     |
| #7  | MEDLINE_EMBASE | Economic model to examine the cost benefit associated with resolution or improvement of carcinoid syndrome symptoms following treatment with above-standard dose of octreotidelar in patients with neuroendocrine tumors based on data from a retrospective chart review study at three large tertiary oncology centers in the United States. |
| #8  | MEDLINE_EMBASE | 44th ESCP International Symposium on Clinical Pharmacy Medicines Information: Making Better Decisions.                                                                                                                                                                                                                                        |
| #9  | MEDLINE_EMBASE | Identification of indicators for evaluating the financial and economic performance of the pharmacy: A systematic review.                                                                                                                                                                                                                      |
| #10 | MEDLINE_EMBASE | Cost-avoidance and qualitative analysis of clinical pharmacy interventions by psychiatric pharmacy residents at state psychiatric facilities.                                                                                                                                                                                                 |
| #11 | MEDLINE_EMBASE | Pharmacist-involved care for patients with heart failure and acute coronary syndrome: A systematic review with qualitative and quantitative meta-analysis.                                                                                                                                                                                    |
| #14 | MEDLINE_EMBASE | The Role of the Clinical Pharmacist in the Care of Patients with Cardiovascular Disease.                                                                                                                                                                                                                                                      |
| #15 | MEDLINE_EMBASE | Comparative efficacy and safety of estradiol transdermal preparations for the treatment of vasomotor symptoms in postmenopausal women: An indirect comparison meta-analysis.                                                                                                                                                                  |
| #16 | MEDLINE_EMBASE | Medication adherence to oral cancer therapy: The promising role of the pharmacist.                                                                                                                                                                                                                                                            |
| #17 | MEDLINE_EMBASE | Hospital pharmacist-led review of medication in the home in the paediatric palliative care population.                                                                                                                                                                                                                                        |
| #18 | MEDLINE_EMBASE | Tools for Assessing Potential Significance of Pharmacist Interventions: A Systematic Review.                                                                                                                                                                                                                                                  |
| #19 | MEDLINE_EMBASE | FDAMA Section 114: Why the Renewed Interest?.                                                                                                                                                                                                                                                                                                 |
| #20 | MEDLINE_EMBASE | A systematic review on comparing 2 common models for management of warfarin therapy; Pharmacist-led service versus usual medical care.                                                                                                                                                                                                        |
| #21 | MEDLINE_EMBASE | Pharmacist-managed clinics for patient education and counseling in Japan: Current status and future perspectives.                                                                                                                                                                                                                             |
| #22 | MEDLINE_EMBASE | Pharmacy care and adherence to primary and secondary prevention cardiovascular medication: A systematic review of studies.                                                                                                                                                                                                                    |
| #23 | MEDLINE_EMBASE | Effectiveness of practices to increase timeliness of providing targeted therapy for inpatients with bloodstream infections: A laboratory medicine best practices systematic review and meta-analysis.                                                                                                                                         |
| #24 | MEDLINE_EMBASE | Clinical pharmacy service practice in a Chinese tertiary hospital.                                                                                                                                                                                                                                                                            |
| #25 | MEDLINE_EMBASE | Medicine non-adherence in kidney transplantation.                                                                                                                                                                                                                                                                                             |
| #26 | MEDLINE_EMBASE | Standardized patients in pharmacy education: An integrative literature review.                                                                                                                                                                                                                                                                |
| #28 | MEDLINE_EMBASE | Pharmacists performing quality spirometry testing: an evidence based review.                                                                                                                                                                                                                                                                  |
| #29 | MEDLINE_EMBASE | Implementation of medication review with follow-up in a Spanish community pharmacy and its achieved outcomes.                                                                                                                                                                                                                                 |
| #30 | MEDLINE_EMBASE | Literature review: pharmacists' interventions to improve control and management in type 2 diabetes mellitus.                                                                                                                                                                                                                                  |
| #31 | MEDLINE_EMBASE | Strategic considerations for centralization of services across the pharmacy enterprise.                                                                                                                                                                                                                                                       |
| #32 | MEDLINE_EMBASE | Expanding clinical and information services to the ambulatory older adult through community outreach programs.                                                                                                                                                                                                                                |
| #33 | MEDLINE_EMBASE | Physician-pharmacist collaborative care model for buprenorphine-maintained opioid-dependent patients.                                                                                                                                                                                                                                         |
| #34 | MEDLINE_EMBASE | Three-year review of pharmacy students' interventions and activities in an outpatient teaching family medicine center.                                                                                                                                                                                                                        |
| #35 | MEDLINE_EMBASE | Medication therapy management interventions in outpatient settings: A systematic review and meta-analysis.                                                                                                                                                                                                                                    |
| #36 | MEDLINE_EMBASE | Community pharmacy interventions for public health priorities: A systematic review of community pharmacy-delivered weight, smoking and alcohol management interventions.                                                                                                                                                                      |
| #37 | MEDLINE_EMBASE | Overview of systematic reviews assessing the impact of clinical pharmacy services.                                                                                                                                                                                                                                                            |
| #38 | MEDLINE_EMBASE | Development of a multidimensional scale "CLEO" for evaluation of clinical, economic, and organizational impacts of a pharmacist intervention.                                                                                                                                                                                                 |
| #39 | MEDLINE_EMBASE | A comprehensive review of the impact of clinical pharmacy services on patient outcomes in mental health.                                                                                                                                                                                                                                      |
| #40 | MEDLINE_EMBASE | Improving blood pressure control through pharmacist interventions: a meta-analysis of randomized controlled trials.                                                                                                                                                                                                                           |

|     |                |                                                                                                                                                                                                                                                  |
|-----|----------------|--------------------------------------------------------------------------------------------------------------------------------------------------------------------------------------------------------------------------------------------------|
| #41 | MEDLINE_EMBASE | Integrated clinical and specialty pharmacy practice model for management of patients with multiple sclerosis.                                                                                                                                    |
| #42 | MEDLINE_EMBASE | New anticancer agents: role of clinical pharmacy services.                                                                                                                                                                                       |
| #43 | MEDLINE_EMBASE | On-call pharmacist enquiries and outcomes: An on-call database review, 2003-2012.                                                                                                                                                                |
| #44 | MEDLINE_EMBASE | Community pharmacy interventions for public health priorities: Protocol for a systematic review of community pharmacy-delivered smoking, alcohol and weight management interventions.                                                            |
| #45 | MEDLINE_EMBASE | Economic evaluations of clinical pharmacist interventions on hospital inpatients: a systematic review of recent literature.                                                                                                                      |
| #46 | MEDLINE_EMBASE | Evaluation of pharmacist care for patients with chronic obstructive pulmonary disease: a systematic review and meta-analysis.                                                                                                                    |
| #47 | MEDLINE_EMBASE | Provision of clinical pharmacist services for individuals with chronic hepatitis C viral infection: Joint opinion of the GI/liver/nutrition and infectious diseases practice and research networks of the American College of Clinical Pharmacy. |
| #50 | MEDLINE_EMBASE | The survey of patients' satisfaction with outpatient pharmacy and systematic review of dispensing mode in mainland China. [Chinese]                                                                                                              |
| #51 | MEDLINE_EMBASE | The pharmacist role in predicting and improving medication adherence in heart failure patients.                                                                                                                                                  |
| #52 | MEDLINE_EMBASE | A systematic literature review assessing the directional impact of managed care formulary restrictions on medication adherence, clinical outcomes, economic outcomes, and health care resource utilization.                                      |
| #53 | MEDLINE_EMBASE | Balanced scorecards as a tool for developing patient-centered pharmacy services.                                                                                                                                                                 |
| #54 | MEDLINE_EMBASE | The impact of 5-HT3RA use on cost and utilization in patients with chemotherapy-induced nausea and vomiting: Systematic review of the literature.                                                                                                |
| #55 | MEDLINE_EMBASE | The significance of pharmacy interventions: An updated review in the presence of electronic order entry.                                                                                                                                         |
| #56 | MEDLINE_EMBASE | Issues facing pharmacy leaders in 2014: Suggestions for pharmacy strategic planning.                                                                                                                                                             |
| #57 | MEDLINE_EMBASE | Remember the MaineRx.                                                                                                                                                                                                                            |
| #58 | MEDLINE_EMBASE | Economic burden of urgency urinary incontinence in the United States: A systematic review.                                                                                                                                                       |
| #59 | MEDLINE_EMBASE | Pharmacists' role in addressing opioid abuse, addiction, and diversion.                                                                                                                                                                          |
| #60 | MEDLINE_EMBASE | A systematic review and meta-analysis of pharmacist-led fee-for-services medication review.                                                                                                                                                      |
| #61 | MEDLINE_EMBASE | The grace checklist for rating the quality of observational studies of comparative effectiveness: A tale of hope and caution.                                                                                                                    |
| #62 | MEDLINE_EMBASE | Development and validation of a multidimensional scale "CLEO" for evaluating potential significance of pharmacist interventions.                                                                                                                 |
| #63 | MEDLINE_EMBASE | "Healthcare Cost, Quality, and Policy: Driving Stakeholder Innovation in Process and Practice".                                                                                                                                                  |
| #64 | MEDLINE_EMBASE | Review on medicines prices and availability in Indonesia: 2004 to 2012.                                                                                                                                                                          |
| #65 | MEDLINE_EMBASE | Pharmacotherapy review as a safety and cost tool in patients management in Slovenian Psychiatric Hospital.                                                                                                                                       |
| #66 | MEDLINE_EMBASE | Can community pharmacy contribute to weight management? A qualitative study of the perspectives of the pharmacy team.                                                                                                                            |
| #67 | MEDLINE_EMBASE | APhA2014 Abstracts.                                                                                                                                                                                                                              |
| #68 | MEDLINE_EMBASE | Pharmacist vaccination programs for common infectious diseases: A systematic review of the literature on this emerging model of care.                                                                                                            |
| #69 | MEDLINE_EMBASE | Quality of pharmacist-managed anticoagulation therapy in long-term ambulatory settings: A systematic review.                                                                                                                                     |
| #70 | MEDLINE_EMBASE | The impact of intra-operative dexmedetomidine infusion on immediate postoperative pain: A systematic review protocol.                                                                                                                            |
| #71 | MEDLINE_EMBASE | Consortium recommendations for advancing pharmacists' patient care services and collaborative practice agreements.                                                                                                                               |
| #72 | MEDLINE_EMBASE | Assessing the Implementability of Clinical Pharmacist Interventions in Patients With Chronic Kidney Disease: An Analysis of Systematic Reviews.                                                                                                  |
| #73 | MEDLINE_EMBASE | Pharmacist contributions as members of the multidisciplinary ICU team.                                                                                                                                                                           |
| #74 | MEDLINE_EMBASE | A systematic review of the economic and humanistic burden of illness in irritable bowel syndrome and chronic constipation.                                                                                                                       |
| #75 | MEDLINE_EMBASE | A survey of individuals in US-based pharmaceutical industry HEOR departments: Attitudes on policy topics.                                                                                                                                        |
| #76 | MEDLINE_EMBASE | New models of chronic kidney disease care including pharmacists: Improving medication reconciliation and medication management.                                                                                                                  |
| #77 | MEDLINE_EMBASE | Medication underdosing and underprescribing: Issues that may contribute to polypharmacy, poor outcomes.                                                                                                                                          |
| #78 | MEDLINE_EMBASE | The effect of pharmacist-provided non-dispensing services on patient outcomes, health service utilisation and costs in low- and middle-income countries.                                                                                         |
| #79 | MEDLINE_EMBASE | Clinical pharmacy services in heart failure: An opinion paper from the heart failure Society of America and American College of Clinical Pharmacy Cardiology Practice and Research Network.                                                      |
| #80 | MEDLINE_EMBASE | Expanding the role of community pharmacists: Policymaking in the absence of policy-relevant evidence?.                                                                                                                                           |
| #82 | MEDLINE_EMBASE | Medication Reviews by Clinical Pharmacists at Hospitals Lead to Improved Patient Outcomes: A Systematic Review.                                                                                                                                  |
| #83 | MEDLINE_EMBASE | Issues facing pharmacy leaders in 2013.                                                                                                                                                                                                          |
| #84 | MEDLINE_EMBASE | Transforming hypertension management using mobile health technology for telemonitoring and self-care support.                                                                                                                                    |

|      |                |                                                                                                                                                                                     |
|------|----------------|-------------------------------------------------------------------------------------------------------------------------------------------------------------------------------------|
| #85  | MEDLINE_EMBASE | Implications of real-world adherence on cost-effectiveness analysis in multiple sclerosis.                                                                                          |
| #86  | MEDLINE_EMBASE | Narrative review of the literature on adherence to disease- modifying therapies among patients with multiple sclerosis.                                                             |
| #87  | MEDLINE_EMBASE | Patient perceptions of the value of pharmacy-based clinical services: A systematic review.                                                                                          |
| #88  | MEDLINE_EMBASE | A systematic review of community pharmacy-based interventions for smoking cessation.                                                                                                |
| #89  | MEDLINE_EMBASE | A systematic literature review of the impact of 5-HT3RA use on health care utilization in patients with chemotherapy-induced nausea and vomiting in the United States.              |
| #90  | MEDLINE_EMBASE | Methods assessing the significance of a pharmacist intervention: Literature review.                                                                                                 |
| #91  | MEDLINE_EMBASE | Biosimilar medicines in the management of the hospital pharmacy.                                                                                                                    |
| #92  | MEDLINE_EMBASE | Colloque Annuel 2013 du Regroupement Quebecois de Recherche sur L'Usage du Medicament. [French, English]                                                                            |
| #93  | MEDLINE_EMBASE | CPNP's 16th Annual Meeting.                                                                                                                                                         |
| #94  | MEDLINE_EMBASE | Improving inappropriate medication use among elderly veterans: Impact of medication review on polypharmacy.                                                                         |
| #95  | MEDLINE_EMBASE | The potential role of clinical pharmacy services in patients with cardiovascular diseases.                                                                                          |
| #96  | MEDLINE_EMBASE | Review of survey articles regarding medication therapy management (MTM) services/programs in the United States.                                                                     |
| #97  | MEDLINE_EMBASE | Effect of a pharmacist-managed hypertension program on health system costs: An evaluation of the study of cardiovascular risk intervention by pharmacists-hypertension (SCRIP-HTN). |
| #98  | MEDLINE_EMBASE | Implementation of a comprehensive pharmaceutical care program for an underserved population.                                                                                        |
| #99  | MEDLINE_EMBASE | An analysis of quality of systematic reviews on pharmacist health interventions.                                                                                                    |
| #100 | MEDLINE_EMBASE | The role of the pharmacist in optimizing pharmacotherapy in older people.                                                                                                           |
| #101 | MEDLINE_EMBASE | An innovative approach to pharmacy management in a state correctional system.                                                                                                       |
| #102 | MEDLINE_EMBASE | Pharmaceutical technology assessment: Perspectives from payers.                                                                                                                     |
| #103 | MEDLINE_EMBASE | A cost-effectiveness evaluation of hospital discharge counseling by pharmacists.                                                                                                    |
| #104 | MEDLINE_EMBASE | Effects of a pharmacy-care program on adherence and outcomes.                                                                                                                       |
| #105 | MEDLINE_EMBASE | Economic and clinical impact of a pharmacy resident at a large academic medical center.                                                                                             |
| #106 | MEDLINE_EMBASE | "Brown bag" CMRs: Review of the medicine cabinet.                                                                                                                                   |
| #107 | MEDLINE_EMBASE | Abstracts from the Quality of Care and Outcomes Research in Cardiovascular Disease and Stroke 2012 Scientific Sessions, QCOR 2012.                                                  |
| #108 | MEDLINE_EMBASE | Evaluation of a pharmacist culture review process in an Emergency Department.                                                                                                       |
| #109 | MEDLINE_EMBASE | Systematic review of diabetes disease management interventions.                                                                                                                     |
| #110 | MEDLINE_EMBASE | White paper on expanding the role of pharmacists in chronic obstructive pulmonary disease.                                                                                          |
| #111 | MEDLINE_EMBASE | Pharmacist-provided immunization compensation and recognition: White paper summarizing APhA/AMCP stakeholder meeting.                                                               |
| #112 | MEDLINE_EMBASE | Inventory management in pharmacy practice: A review of literature.                                                                                                                  |
| #113 | MEDLINE_EMBASE | Factors affecting the cost effectiveness of antibiotics.                                                                                                                            |
| #114 | MEDLINE_EMBASE | ASHP guidelines on emergency medicine pharmacist services.                                                                                                                          |
| #115 | MEDLINE_EMBASE | Is there a benefit to having a clinical oncology pharmacist on staff at a community oncology clinic?.                                                                               |
| #116 | MEDLINE_EMBASE | Impacting readmission rates and patient satisfaction: Results of a discharge pharmacist pilot program.                                                                              |
| #117 | MEDLINE_EMBASE | Remote order entry services: Providing 24-hour pharmaceutical care for small to medium sized hospitals.                                                                             |
| #118 | MEDLINE_EMBASE | Pharmacist-managed telephone clinic review of antedementia medication effectiveness.                                                                                                |
| #119 | MEDLINE_EMBASE | Adherence to medication under mandatory and voluntary mail benefit designs.                                                                                                         |
| #120 | MEDLINE_EMBASE | Cost-effectiveness of interventions to enhance medication Adherence in Psychiatric Patients: A Systematic Review.                                                                   |
| #121 | MEDLINE_EMBASE | A cost effectiveness analysis of thiopurine methyltransferase testing for guiding 6-mercaptopurine dosing in children with acute lymphoblastic leukemia.                            |
| #122 | MEDLINE_EMBASE | The roles of community pharmacists in cardiovascular disease prevention and management.                                                                                             |
| #123 | MEDLINE_EMBASE | Use of pharmacy delivery robots in intensive care units.                                                                                                                            |
| #124 | MEDLINE_EMBASE | Development and implementation of a pharmacist-managed clinical pharmacogenetics service.                                                                                           |
| #125 | MEDLINE_EMBASE | Role of community pharmacists in asthma - Australian research highlighting pathways for future primary care models.                                                                 |
| #126 | MEDLINE_EMBASE | Lightening the load? A systematic review of community pharmacy-based weight management interventions.                                                                               |
| #127 | MEDLINE_EMBASE | Role of collaborative care models including pharmacists in improving blood pressure management in chronic kidney disease patients.                                                  |
| #128 | MEDLINE_EMBASE | Pharmaceutical step-therapy interventions: A critical review of the literature.                                                                                                     |
| #129 | MEDLINE_EMBASE | Interdisciplinary patient care in the intensive care unit: Focus on the pharmacist.                                                                                                 |
| #130 | MEDLINE_EMBASE | Payment for clinical pharmacy services revisited.                                                                                                                                   |
| #131 | MEDLINE_EMBASE | Effectiveness of pharmacy interventions in improving availability of essential medicines at the primary healthcare level.                                                           |

|      |                |                                                                                                                                                                                                    |
|------|----------------|----------------------------------------------------------------------------------------------------------------------------------------------------------------------------------------------------|
| #132 | MEDLINE_EMBASE | Joint Forces Pharmacy Seminar, JFPS 2011 Abstracts.                                                                                                                                                |
| #133 | MEDLINE_EMBASE | Late-Breaking Clinical Trial and Clinical Science: Special Reports Abstracts from the American Heart Association's Scientific Sessions 2011.                                                       |
| #134 | MEDLINE_EMBASE | Interventions to improve patients compliance with lipid lowering medications: A systematic review of the literature.                                                                               |
| #135 | MEDLINE_EMBASE | A retrospective review of medication orders entered for emergency department patients within an academic teaching medical center for quality assurance.                                            |
| #136 | MEDLINE_EMBASE | 2011 American Society of Consultant Pharmacists, ASCP Annual Meeting and Exhibition.                                                                                                               |
| #137 | MEDLINE_EMBASE | Literature review of randomized, controlled studies of the impact of pharmacists' interventions to improve patient outcomes.                                                                       |
| #138 | MEDLINE_EMBASE | Comparative-effectiveness of pharmacist interventions using a decision modeling approach.                                                                                                          |
| #139 | MEDLINE_EMBASE | An evaluation of clinical pharmacist contributions in paediatrics.                                                                                                                                 |
| #140 | MEDLINE_EMBASE | A structured literature review of the direct costs of adult systemic lupus erythematosus in the US.                                                                                                |
| #141 | MEDLINE_EMBASE | Blood pressure kiosks for medication therapy management programs: Business opportunity for pharmacists.                                                                                            |
| #142 | MEDLINE_EMBASE | Billing for pharmacists' cognitive services in physicians' offices: Multiple methods of reimbursement.                                                                                             |
| #143 | MEDLINE_EMBASE | Rational use of medicine in the pediatric age group: A summary on the role of clinical pharmacists.                                                                                                |
| #144 | MEDLINE_EMBASE | The Effectiveness of Pharmacist Interventions on Asthma Management: A Systematic Review.                                                                                                           |
| #145 | MEDLINE_EMBASE | Systematic review of pharmacist interventions to improve adherence to oral antidiabetic medications in people with type 2 diabetes.                                                                |
| #146 | MEDLINE_EMBASE | Committee opinion no 544: Over-the-counter access to oral contraceptives.                                                                                                                          |
| #147 | MEDLINE_EMBASE | The comparative economic burden of mild, moderate, and severe fibromyalgia: Results from a retrospective chart review and cross-sectional survey of working-age U.S. adults.                       |
| #148 | MEDLINE_EMBASE | Recent trends on the future of graduate education in the pharmaceutical sciences and research.                                                                                                     |
| #149 | MEDLINE_EMBASE | The team education and adherence monitoring (TEAM) trial: Pharmacy interventions to improve hypertension control in blacks.                                                                        |
| #150 | MEDLINE_EMBASE | A review of remediation programs in pharmacy and other health professions.                                                                                                                         |
| #151 | MEDLINE_EMBASE | Implementation of a telepharmacy service to provide round-the-clock medication order review by pharmacists.                                                                                        |
| #152 | MEDLINE_EMBASE | Operation of a radiopharmacy for a clinical trial.                                                                                                                                                 |
| #153 | MEDLINE_EMBASE | Value of conducting pharmacy residency training - The organizational perspective.                                                                                                                  |
| #154 | MEDLINE_EMBASE | Symposium on roles of and cooperation between academic- and practice-based pharmacy clinicians.                                                                                                    |
| #155 | MEDLINE_EMBASE | Budgetary impact of treatment with adjuvant imatinib for 1 year following surgical resection of kit-positive localized gastrointestinal stromal tumors.                                            |
| #156 | MEDLINE_EMBASE | Formulary review of 2 new biologic agents: Tocilizumab for rheumatoid arthritis and ustekinumab for plaque psoriasis.                                                                              |
| #157 | MEDLINE_EMBASE | Establishing a central order entry system for delivering telepharmacy services to remote rural hospitals.                                                                                          |
| #158 | MEDLINE_EMBASE | Health care policy and community pharmacy: Implications for the New Zealand primary health care sector.                                                                                            |
| #159 | MEDLINE_EMBASE | Potential cost savings for a health system-based employee outpatient pharmacy.                                                                                                                     |
| #160 | MEDLINE_EMBASE | Prophylaxis of cervical cancer and related cervical disease: A review of the cost-effectiveness of vaccination against oncogenic HPV types.                                                        |
| #161 | MEDLINE_EMBASE | UK interventions to control medicines wastage: A critical review.                                                                                                                                  |
| #162 | MEDLINE_EMBASE | Patient perspective, complexities, and challenges in managed care.                                                                                                                                 |
| #163 | MEDLINE_EMBASE | Empirical view of opioid dependence.                                                                                                                                                               |
| #164 | MEDLINE_EMBASE | Introduction: Landscape of opioid dependence.                                                                                                                                                      |
| #165 | MEDLINE_EMBASE | Strategies for improving asthma outcomes: A case-based review of successes and pitfalls.                                                                                                           |
| #166 | MEDLINE_EMBASE | Effective use of workload and productivity monitoring tools in health-system pharmacy, part 2.                                                                                                     |
| #167 | MEDLINE_EMBASE | Evidence-based, multidisciplinary approach to the development of a Crotalidae polyvalent antivenin (CroFab) protocol at a university hospital.                                                     |
| #168 | MEDLINE_EMBASE | Current challenges in European oncology pharmacy practice.                                                                                                                                         |
| #169 | MEDLINE_EMBASE | Effective use of workload and productivity monitoring tools in health-system pharmacy, part 1.                                                                                                     |
| #170 | MEDLINE_EMBASE | Systematic review of the implementation and evaluation of Pharmaceutical Care in hospitalised patients (Pharmaceutical Care implementation in hospitalised patients. Systematic review). [Spanish] |
| #171 | MEDLINE_EMBASE | Interventions to improve compliance with lipid lowering medications: A systematic review of the literature.                                                                                        |
| #172 | MEDLINE_EMBASE | Evidence used during pharmaceutical technology assessment.                                                                                                                                         |
| #173 | MEDLINE_EMBASE | Willingness to pay for pharmacy services: A review.                                                                                                                                                |
| #174 | MEDLINE_EMBASE | The methodological quality and effectiveness of adherence interventions: A review of diabetes type II interventions.                                                                               |
| #175 | MEDLINE_EMBASE | The impact of pharmacist intervention on patients' adherence to antidepressant medication and patient-reported outcomes.                                                                           |
| #176 | MEDLINE_EMBASE | A systematic review to identify specific pharmacists' interventions and outcomes associated with drug therapy.                                                                                     |

|      |                |                                                                                                                                              |
|------|----------------|----------------------------------------------------------------------------------------------------------------------------------------------|
| #177 | MEDLINE_EMBASE | A systematic literature review of the direct costs of systemic lupus erythematosus (SLE) in the United States (US).                          |
| #178 | MEDLINE_EMBASE | Retrospective chart review of a clinical pharmacist's interventions during rounds in a hospice inpatient unit.                               |
| #179 | MEDLINE_EMBASE | Community pharmacy EHC services: A review of uptake and users in one primary care organisation 2028-2009.                                    |
| #180 | MEDLINE_EMBASE | The role of pharmacotherapy and managed care pharmacy interventions in the treatment of ADHD.                                                |
| #182 | MEDLINE_EMBASE | Current and future directions in MS management: Key considerations for managed care pharmacists.                                             |
| #183 | MEDLINE_EMBASE | Evaluation and justification of clinical pharmacy services.                                                                                  |
| #184 | MEDLINE_EMBASE | Review of prasugrel for the secondary prevention of atherothrombosis.                                                                        |
| #185 | MEDLINE_EMBASE | Cognitive services in community pharmacy: Pharmaceutical interventions and medication review. [Slovene]                                      |
| #186 | MEDLINE_EMBASE | Critical review of prasugrel for formulary decision makers.                                                                                  |
| #187 | MEDLINE_EMBASE | Implementing a comprehensive, 24-hour emergency department pharmacy program.                                                                 |
| #188 | MEDLINE_EMBASE | Establishing the role of the pharmacist in the patient-centered medical home... The opportunity is now.                                      |
| #189 | MEDLINE_EMBASE | Economic burden of prescription opioid misuse and abuse.                                                                                     |
| #190 | MEDLINE_EMBASE | Improving cost-effectiveness of and outcomes from drug therapy in patients with atrial fibrillation in managed care: Role of the pharmacist. |
| #191 | MEDLINE_EMBASE | Pharmacologic management of atrial fibrillation: Established and emerging options.                                                           |
| #192 | MEDLINE_EMBASE | Clinical, economic, and quality of life impact of atrial fibrillation.                                                                       |
| #193 | MEDLINE_EMBASE | AMCP guide to pharmaceutical payment methods, 2009 update.                                                                                   |
| #194 | MEDLINE_EMBASE | Provision of clinical pharmacy services in two safety net provider settings.                                                                 |
| #195 | MEDLINE_EMBASE | Health technology assessment (HTA) of medical devices in the Veneto region, Italy. [Italian]                                                 |
| #196 | MEDLINE_EMBASE | ERISA preemption and the question of pharmacy benefit managers' fiduciary duty.                                                              |
| #197 | MEDLINE_EMBASE | Effect of clinical pharmacists on care in the emergency department: A systematic review.                                                     |
| #198 | MEDLINE_EMBASE | The feasibility of providing community pharmacy-based services for alcohol misuse: A literature review.                                      |
| #199 | MEDLINE_EMBASE | Collaborative strategies for improving clinical resource utilization: How pharmacists can make a difference.                                 |
| #200 | MEDLINE_EMBASE | APOSTAT - an electronic database for documentation and analysis of pharmaceutical interventions. [German]                                    |
| #201 | MEDLINE_EMBASE | A blueprint for pharmacy benefit managers to increase value.                                                                                 |
| #202 | MEDLINE_EMBASE | Review of the clinical debate regarding interventions for multiple sclerosis.                                                                |
| #203 | MEDLINE_EMBASE | Budgetary impact of varenicline in smoking cessation in the United Kingdom.                                                                  |
| #204 | MEDLINE_EMBASE | Pharmacist involvement in improving asthma outcomes in various healthcare settings: 1997 to present.                                         |
| #205 | MEDLINE_EMBASE | Medication review and patient counselling at discharge from the hospital by community pharmacists.                                           |
| #206 | MEDLINE_EMBASE | CSHP Summer Educational Sessions (SES) 2009: Poster Abstracts.                                                                               |
| #207 | MEDLINE_EMBASE | A retrospective review of erythrocyte stimulating agents (ESA) usage in pharmacy claims data.                                                |
| #208 | MEDLINE_EMBASE | Intersectoral collaboration to enable bridging education for pharmacists: The international pharmacy graduate program in Ontario, Canada.    |
| #209 | MEDLINE_EMBASE | A 10-year-review (1998 - 2007) on 3449 cases of osteoporotic hip fractures: trend of hospitalization and inpatient costs. [Chinese]          |
| #210 | MEDLINE_EMBASE | Testing the long term stability of vancomycin ophthalmic solution.                                                                           |
| #211 | MEDLINE_EMBASE | Pharmacy education in the context of Australian practice.                                                                                    |
| #212 | MEDLINE_EMBASE | Optimal treatment of chronic constipation in managed care: Review and roundtable discussion.                                                 |
| #213 | MEDLINE_EMBASE | A primer on critical care pharmacy services.                                                                                                 |
| #214 | MEDLINE_EMBASE | Targeting low HDL-cholesterol to decrease residual cardiovascular risk in the managed care setting.                                          |
| #215 | MEDLINE_EMBASE | Economic and clinical impact of multiple myeloma to managed care.                                                                            |
| #216 | MEDLINE_EMBASE | Rebates and spreads: Pharmacy benefit management practices and corporate citizenship.                                                        |
| #217 | MEDLINE_EMBASE | Special needs plans.                                                                                                                         |
| #218 | MEDLINE_EMBASE | Pay-for-performance initiatives.                                                                                                             |
| #219 | MEDLINE_EMBASE | Medication therapy management.                                                                                                               |
| #220 | MEDLINE_EMBASE | Overview of current medicare part D offerings.                                                                                               |
| #221 | MEDLINE_EMBASE | Medication compliance, adherence, and persistence: Current status of behavioral and educational interventions to improve outcomes.           |
| #222 | MEDLINE_EMBASE | Clinical pharmacy services in the home.                                                                                                      |
| #223 | MEDLINE_EMBASE | Therapy analysis and evidenced-based treatment guidelines (including review of antiviral medications).                                       |
| #224 | MEDLINE_EMBASE | Managing type 2 diabetes: Going beyond glycemic control.                                                                                     |
| #225 | MEDLINE_EMBASE | Pharmaceutical care in community pharmacies: Practice and research in Estonia.                                                               |

|      |                |                                                                                                                                                                   |
|------|----------------|-------------------------------------------------------------------------------------------------------------------------------------------------------------------|
| #226 | MEDLINE_EMBASE | The state of health economic and pharmacoeconomic evaluation research in Zimbabwe: A review.                                                                      |
| #227 | MEDLINE_EMBASE | Managed care perspective on three new agents for type 2 diabetes.                                                                                                 |
| #228 | MEDLINE_EMBASE | Benefit design innovation to manage specialty pharmaceuticals.                                                                                                    |
| #229 | MEDLINE_EMBASE | Managing the intersection of medical and pharmacy benefits.                                                                                                       |
| #230 | MEDLINE_EMBASE | The promise of specialty pharmaceuticals: Are they worth the price?                                                                                               |
| #231 | MEDLINE_EMBASE | Economic effects of clinical pharmacy interventions: A literature review.                                                                                         |
| #232 | MEDLINE_EMBASE | Pharmacist-led interventions for the management of cardiovascular disease: Opportunities and obstacles.                                                           |
| #233 | MEDLINE_EMBASE | A systematic review of remuneration systems for clinical pharmacy care services.                                                                                  |
| #234 | MEDLINE_EMBASE | Effects of pharmacist outpatient interventions on adults with diabetes mellitus: A systematic review.                                                             |
| #235 | MEDLINE_EMBASE | Economic burden in direct costs of concomitant chronic obstructive pulmonary disease and asthma in a Medicare Advantage population.                               |
| #236 | MEDLINE_EMBASE | Operationalizing MTM through the use of Health Information Technology.                                                                                            |
| #237 | MEDLINE_EMBASE | Information technology for the treatment of diabetes: Improving outcomes and controlling cost.                                                                    |
| #238 | MEDLINE_EMBASE | Medicare Part D: Selected issues for plan sponsors, pharmacists, and beneficiaries in 2008.                                                                       |
| #239 | MEDLINE_EMBASE | Dual degree programs at the University of Kentucky College of Pharmacy.                                                                                           |
| #240 | MEDLINE_EMBASE | Achievement of USP chapter <797> compliance by a 35-bed rural hospital: A case study.                                                                             |
| #241 | MEDLINE_EMBASE | Implications of pharmacogenomics in the current and future treatment of asthma.                                                                                   |
| #242 | MEDLINE_EMBASE | Management of chronic diseases in the 21st century: The emerging role of specialty pharmacies.                                                                    |
| #243 | MEDLINE_EMBASE | New strategies in controlling drug resistance.                                                                                                                    |
| #244 | MEDLINE_EMBASE | Targeted chronic myeloid leukemia therapy: Seeking a cure.                                                                                                        |
| #245 | MEDLINE_EMBASE | Chronic myeloid leukemia in 2007.                                                                                                                                 |
| #246 | MEDLINE_EMBASE | Pharmacy input in medications review improves prescribing and cost-efficiency in care homes.                                                                      |
| #247 | MEDLINE_EMBASE | Medicare challenges and solutions - Reimbursement issues in treating the patient with colorectal cancer.                                                          |
| #248 | MEDLINE_EMBASE | Epidemiology, disease progression, and economic burden of colorectal cancer.                                                                                      |
| #249 | MEDLINE_EMBASE | Asthma management guidelines: Updates, advances, and new options.                                                                                                 |
| #250 | MEDLINE_EMBASE | What employers need to know about the changing landscape of the pharmaceutical marketplace.                                                                       |
| #251 | MEDLINE_EMBASE | Treatment-resistant depression: Managed care considerations.                                                                                                      |
| #252 | MEDLINE_EMBASE | Outcomes of secondary hyperparathyroidism in chronic kidney disease and the direct costs of treatment.                                                            |
| #253 | MEDLINE_EMBASE | Medication errors in older adults: A review of recent publications.                                                                                               |
| #254 | MEDLINE_EMBASE | Adverse drug reactions and current state of drug regimen review in nursing facilities: Need for a change?.                                                        |
| #255 | MEDLINE_EMBASE | Pharmacists' role in the post-discharge management of patients with heart failure: A literature review.                                                           |
| #256 | MEDLINE_EMBASE | Pharmacoeconomic analysis of clopidogrel in secondary prevention of coronary artery disease.                                                                      |
| #257 | MEDLINE_EMBASE | Providing patient care in community pharmacies: Practice and research in Finland.                                                                                 |
| #258 | MEDLINE_EMBASE | 30 Ways to control health care costs.                                                                                                                             |
| #259 | MEDLINE_EMBASE | Medicare Part D: Selected issues for pharmacists and beneficiaries in 2007.                                                                                       |
| #260 | MEDLINE_EMBASE | Use of low-molecular-weight heparin during dental extractions in a medicaid population.                                                                           |
| #261 | MEDLINE_EMBASE | Drug-related problems in hospitals: A review of the recent literature.                                                                                            |
| #262 | MEDLINE_EMBASE | Pharmaceutical care in community pharmacies: Practice and research in Denmark.                                                                                    |
| #263 | MEDLINE_EMBASE | Clinical pharmacy services in a home-based palliative care program.                                                                                               |
| #264 | MEDLINE_EMBASE | Total knee replacement delayed with hylan G-F 20 use in patients with grade IV osteoarthritis.                                                                    |
| #265 | MEDLINE_EMBASE | Type 2 diabetes and cardiovascular disease: Reducing the risk.                                                                                                    |
| #266 | MEDLINE_EMBASE | A randomised controlled trial of the effects of note-based medication review by community pharmacists on prescribing of cardiovascular drugs in general practice. |
| #267 | MEDLINE_EMBASE | Evaluating the costs of brand-name and generic prescriptions dispensed by mail versus retail.                                                                     |
| #268 | MEDLINE_EMBASE | Drug utilization review in an extended care facility. 1974.                                                                                                       |
| #269 | MEDLINE_EMBASE | Continuing education: Geriatric care: From adverse events to urinary incontinence.                                                                                |
| #270 | MEDLINE_EMBASE | Economic impact of antidiabetic medications and glycemic control on managed care organizations: A review of the literature.                                       |
| #271 | MEDLINE_EMBASE | Medication adherence: A challenge for patients with postmenopausal osteoporosis and other chronic illnesses.                                                      |
| #272 | MEDLINE_EMBASE | Prescription drug therapies for prevention and treatment of postmenopausal osteoporosis.                                                                          |
| #273 | MEDLINE_EMBASE | Introduction: Postmenopausal osteoporosis as a major public health issue.                                                                                         |
| #274 | MEDLINE_EMBASE | Review of eight pharmacoeconomic studies of the value of biologic DMARDs (adalimumab, etanercept, and infliximab) in the management of rheumatoid arthritis.      |

|      |                |                                                                                                                                                                              |
|------|----------------|------------------------------------------------------------------------------------------------------------------------------------------------------------------------------|
| #275 | MEDLINE_EMBASE | Prevalence of drug-related problems and cost-savings opportunities in Medicaid high utilizers identified by a pharmacist-run drug regimen review center.                     |
| #276 | MEDLINE_EMBASE | A comparison of clinical practice guidelines in the initial pharmacological management of new-onset epilepsy in adults.                                                      |
| #277 | MEDLINE_EMBASE | Specialty pharmacy cost management strategies of private health care payers.                                                                                                 |
| #278 | MEDLINE_EMBASE | What are incretins, and how will they influence the management of type 2 diabetes?                                                                                           |
| #279 | MEDLINE_EMBASE | Economic considerations in managing patients with chronic stable angina.                                                                                                     |
| #280 | MEDLINE_EMBASE | From asthma severity to asthma control: Identification of new guidelines.                                                                                                    |
| #281 | MEDLINE_EMBASE | The effects of pharmacist interventions on patients with polypharmacy. [Spanish]                                                                                             |
| #282 | MEDLINE_EMBASE | Effect of attitudes and perceptions of independent community pharmacy owners/managers on the comprehensiveness of strategic planning.                                        |
| #283 | MEDLINE_EMBASE | Community pharmacy services in Portugal.                                                                                                                                     |
| #284 | MEDLINE_EMBASE | Current state of community pharmacy in Japan: Practice, research, and future opportunities or challenges.                                                                    |
| #285 | MEDLINE_EMBASE | New recommendations from the Institute of Medicine on preventing medication errors.                                                                                          |
| #286 | MEDLINE_EMBASE | Pharmaceutical care in community pharmacies: Practice and research in the US.                                                                                                |
| #287 | MEDLINE_EMBASE | Pharmacy-managed anticoagulation: Assessment of in-hospital efficacy and evaluation of financial impact and community acceptance.                                            |
| #288 | MEDLINE_EMBASE | Bringing the benefits of anticoagulation management services to the community.                                                                                               |
| #289 | MEDLINE_EMBASE | Potential role of the community liaison pharmacist: Stakeholder views.                                                                                                       |
| #290 | MEDLINE_EMBASE | Substance abuse and psychiatric disorders in HIV-positive patients: Epidemiology and impact on antiretroviral therapy.                                                       |
| #291 | MEDLINE_EMBASE | Evaluating outpatient pharmacy services: A literature review of specialist heart failure services.                                                                           |
| #292 | MEDLINE_EMBASE | Personal digital assistant (PDA) clinical intervention documentation system: Development implementation, and comparison to a previous paper-based system.                    |
| #293 | MEDLINE_EMBASE | Projecting future drug, expenditures - 2006.                                                                                                                                 |
| #294 | MEDLINE_EMBASE | Effective communication of antimicrobial susceptibility data by pathologists to clinicians.                                                                                  |
| #295 | MEDLINE_EMBASE | Clinical monograph for drug formulary review: erectile dysfunction agents.                                                                                                   |
| #296 | MEDLINE_EMBASE | Medication therapy management services: a critical review.                                                                                                                   |
| #297 | MEDLINE_EMBASE | Essential steps and practical applications for database studies.                                                                                                             |
| #298 | MEDLINE_EMBASE | Clinical monograph for drug formulary review: systemic agents for psoriasis/psoriatic arthritis.                                                                             |
| #299 | MEDLINE_EMBASE | The evolving use of cost-effectiveness analysis in formulary management within the department of veterans affairs.                                                           |
| #300 | MEDLINE_EMBASE | Pharmacy utilization and the Medicare Modernization Act.                                                                                                                     |
| #302 | MEDLINE_EMBASE | Community pharmacy services to optimise the use of medications for mental illness: A systematic review.                                                                      |
| #303 | MEDLINE_EMBASE | Graduate studies as part of a career path for Saskatchewan pharmacy students.                                                                                                |
| #304 | MEDLINE_EMBASE | Effectiveness and acceptability of community pharmacy-based interventions in type 2 diabetes: A critical review of intervention design, pharmacist and patient perspectives. |
| #305 | MEDLINE_EMBASE | Maximizing your profits with pharmacy control strategies.                                                                                                                    |
| #306 | MEDLINE_EMBASE | Deregulating the pharmacy market: The case of Iceland and Norway.                                                                                                            |
| #307 | MEDLINE_EMBASE | Understanding the impacts of the Medicare Modernization Act: Concerns of congressional staff.                                                                                |
| #308 | MEDLINE_EMBASE | The roles of community pharmacists in managing patients with diabetes: Perceptions of health care professionals in Nova Scotia.                                              |
| #309 | MEDLINE_EMBASE | The growth of psychopharmacology in the 1990s: Evidence-based practice or irrational exuberance.                                                                             |
| #310 | MEDLINE_EMBASE | Devices for ambulatory and home monitoring of blood pressure, lipids, coagulation, and weight management, part 2.                                                            |
| #311 | MEDLINE_EMBASE | The medicare prescription drug benefit and managed care pharmacy.                                                                                                            |
| #312 | MEDLINE_EMBASE | Devices for ambulatory and home monitoring of blood pressure, lipids, coagulation, and weight management, part 1.                                                            |
| #313 | MEDLINE_EMBASE | Patient education and treatment strategies implemented at a pharmacist-managed hepatitis C virus clinic.                                                                     |
| #314 | MEDLINE_EMBASE | The involvement of pharmacists in cardiac rehabilitation: A review of the literature.                                                                                        |
| #315 | MEDLINE_EMBASE | Rational use of medicines - An important issue in pharmaceutical policy.                                                                                                     |
| #316 | MEDLINE_EMBASE | The clinical effectiveness initiative: A pharmacy analysis to improve outcomes and costs of drug therapy.                                                                    |
| #317 | MEDLINE_EMBASE | Is oncology compatible with specialty pharmacy?                                                                                                                              |
| #318 | MEDLINE_EMBASE | Alternative strategies for medicare payment of outpatient prescription drugs - Part B and beyond.                                                                            |
| #319 | MEDLINE_EMBASE | Managed care pharmacy and medication safety: The fourth estate.                                                                                                              |
| #320 | MEDLINE_EMBASE | The WellPoint outcomes based Formulary<sup>SM</sup>: Enhancing the health technology assessment process.                                                                     |
| #321 | MEDLINE_EMBASE | Pharmacy Benefits Management in the Veterans Health Administration: 1995 to 2003.                                                                                            |

|      |                |                                                                                                                                                                              |
|------|----------------|------------------------------------------------------------------------------------------------------------------------------------------------------------------------------|
| #322 | MEDLINE_EMBASE | A pharmaco-economic model for making value-based decisions about serotonin reuptake inhibitors.                                                                              |
| #323 | MEDLINE_EMBASE | Approaches to pharmacy benefit management and the impact of consumer cost sharing.                                                                                           |
| #324 | MEDLINE_EMBASE | Quality improvement in the continuum of care: impact of atherothrombosis in managed care pharmacy.                                                                           |
| #325 | MEDLINE_EMBASE | Current status of prospective drug utilization review.                                                                                                                       |
| #326 | MEDLINE_EMBASE | A literature review of cardiovascular disease management programs in managed care populations.                                                                               |
| #327 | MEDLINE_EMBASE | Advancements in the treatment of psoriasis: role of biologic agents.                                                                                                         |
| #328 | MEDLINE_EMBASE | Allergic rhinitis, asthma, and rhinosinusitis: diseases of the integrated airway.                                                                                            |
| #329 | MEDLINE_EMBASE | The burden of illness of irritable bowel syndrome: current challenges and hope for the future.                                                                               |
| #330 | MEDLINE_EMBASE | Evidence-based and value-based formulary guidelines.                                                                                                                         |
| #331 | MEDLINE_EMBASE | Framework for pharmacy services quality improvement--a bridge to cross the quality chasm. Part I. The opportunity and the tool.                                              |
| #332 | MEDLINE_EMBASE | Pharmacy residency training in academic medical centers.                                                                                                                     |
| #333 | MEDLINE_EMBASE | Reflexions on the organisation of the purchase of single use supplies associated to biomedical equipments: Respective roles of the biomedical service and pharmacy. [French] |
| #334 | MEDLINE_EMBASE | Pharmacist prescribing: Review of the literature.                                                                                                                            |
| #335 | MEDLINE_EMBASE | Quantitative evaluation of hospital drug formularies in hospitals in Slovak Republic. [Slovak]                                                                               |
| #336 | MEDLINE_EMBASE | Blood, sweat, and tears: Wasted by medicare's missed opportunity.                                                                                                            |
| #337 | MEDLINE_EMBASE | A literature review to identify interventions to improve the use of medicines in children.                                                                                   |
| #338 | MEDLINE_EMBASE | Naltrexone and pharmacy benefit management.                                                                                                                                  |
| #339 | MEDLINE_EMBASE | Evaluation of a community pharmacy reimbursement model for cognitive services-experiment and survey.                                                                         |
| #340 | MEDLINE_EMBASE | A comprehensive system of pharmaceutical care for drug misusers.                                                                                                             |
| #341 | MEDLINE_EMBASE | Optimizing drug prescribing in managed care populations: Improving clinical and economic outcomes.                                                                           |
| #342 | MEDLINE_EMBASE | Assessment of a retrospective drug utilization review alert letter program.                                                                                                  |
| #343 | MEDLINE_EMBASE | Specialty pharmaceuticals: Delivering comprehensive integrated care.                                                                                                         |
| #344 | MEDLINE_EMBASE | Can clinical pharmacy services have a positive impact on drug-related problems and health outcomes in community-based older adults?.                                         |
| #345 | MEDLINE_EMBASE | Prescription Drug Benefits: Cost Management Issues for Medicare.                                                                                                             |
| #346 | MEDLINE_EMBASE | Clinical and Economic Impact of Pharmacy Services in a Low-Income Family Practice Clinic Within a Community Hospital Setting.                                                |
| #347 | MEDLINE_EMBASE | Evidence-Based Core Clinical Pharmacy Services in United States Hospitals in 2020: Services and Staffing.                                                                    |
| #348 | MEDLINE_EMBASE | Fleetwood Project Phase III: Developing a Payment Methodology.                                                                                                               |
| #349 | MEDLINE_EMBASE | A Pharmacist-Physician Antibiotic Support Team.                                                                                                                              |
| #350 | MEDLINE_EMBASE | Implementing pharmaceutical care in an inner city pharmacy: Hypertension management and elderly African Americans.                                                           |
| #351 | MEDLINE_EMBASE | Considerations in Darbepoetin alfa Cost and Reimbursement: A Model for Pharmacy Managers.                                                                                    |
| #352 | MEDLINE_EMBASE | Pharmacist-managed diabetes service in a family medicine practice improves patient outcomes.                                                                                 |
| #353 | MEDLINE_EMBASE | A Review of Clinical Pharmacy Interventions Prior to Implementation of a Personal Digital Assistant Intervention Program in a Community Hospital.                            |
| #354 | MEDLINE_EMBASE | Impact of Disease Management on Cost-Effectiveness of Medicare Spending.                                                                                                     |
| #355 | MEDLINE_EMBASE | Weight variability of scored and unscored split psychotropic drug tablets.                                                                                                   |
| #356 | MEDLINE_EMBASE | Outreach pharmacy service in old age homes: A Hong Kong experience.                                                                                                          |
| #357 | MEDLINE_EMBASE | The Academy of Managed Care Pharmacy Format for Formulary Submissions: An evolving standard - A Foundation for Managed Care Pharmacy task force report.                      |
| #358 | MEDLINE_EMBASE | Reduction of polypharmacy in the elderly: A systematic review of the role of the pharmacist.                                                                                 |
| #359 | MEDLINE_EMBASE | Pharmacy data in the VA health care system.                                                                                                                                  |
| #360 | MEDLINE_EMBASE | A pharmacy-managed intravenous to enteral proton-pump inhibitor conversion program.                                                                                          |
| #361 | MEDLINE_EMBASE | Use of pharmaco-economic information - Report of the ISPOR Task Force on use of pharmaco-economic/health economic information in health-care decision making.                |
| #362 | MEDLINE_EMBASE | Public health interventionists, penny capitalists, or sources of risk?: Assessing street syringe sellers in Hartford, Connecticut.                                           |
| #363 | MEDLINE_EMBASE | Quality use of medicines in aged-care facilities in Australia.                                                                                                               |
| #364 | MEDLINE_EMBASE | Systematic review of the effectiveness of community pharmacy-based interventions to reduce risk behaviours and risk factors for coronary heart disease.                      |
| #365 | MEDLINE_EMBASE | The impact of critical care pharmacists on enhancing patient outcomes.                                                                                                       |
| #366 | MEDLINE_EMBASE | Designing and implementing an effective specialty pharmacy service program.                                                                                                  |
| #367 | MEDLINE_EMBASE | An overview of community pharmacist interventions: Assessing cost-effectiveness and patients' willingness to pay.                                                            |
| #368 | MEDLINE_EMBASE | Creating a hospice pharmacy and therapeutics committee.                                                                                                                      |



|      |                |                                                                                                                                                                                 |
|------|----------------|---------------------------------------------------------------------------------------------------------------------------------------------------------------------------------|
| #369 | MEDLINE_EMBASE | Evaluation of the compliance with law duties in prescriptions of a hospital pharmacy service from Ouro Preto and implications in the patients assistance quality. [Portuguese]  |
| #370 | MEDLINE_EMBASE | Experiences with pharmacy benefit management programmes in the USA.                                                                                                             |
| #371 | MEDLINE_EMBASE | The critical care pharmacist: An essential intensive care practitioner.                                                                                                         |
| #372 | MEDLINE_EMBASE | PBMs: Ripe for regulation.                                                                                                                                                      |
| #373 | MEDLINE_EMBASE | The academy of managed care pharmacy's guidance on the use of clinical and economic evaluation data to support drug formulary decisions.                                        |
| #374 | MEDLINE_EMBASE | Etanercept and its implications for managed care.                                                                                                                               |
| #375 | MEDLINE_EMBASE | Building the outcomes-based formulary.                                                                                                                                          |
| #376 | MEDLINE_EMBASE | A cost analysis of switching calcium channel blockers: A one-year post-formulary decision review.                                                                               |
| #377 | MEDLINE_EMBASE | Pharmacy benefit managers role in facilitating Medicare beneficiary access to pharmaceutical care.                                                                              |
| #378 | MEDLINE_EMBASE | American Consumers Give Mail Service Pharmacy a Strong Vote of Confidence.                                                                                                      |
| #379 | MEDLINE_EMBASE | Managed care pharmacist: Transforming health care through regulatory action (not a managed care story).                                                                         |
| #380 | MEDLINE_EMBASE | Making sense of outpatient pharmacy management: How to control pharmacy costs while delivering quality care.                                                                    |
| #381 | MEDLINE_EMBASE | Pharmacy benefit managers and medicare beneficiary access to prescription drugs.                                                                                                |
| #382 | MEDLINE_EMBASE | Intensive care unit antimicrobial resistance and the role of the pharmacist.                                                                                                    |
| #383 | MEDLINE_EMBASE | Cost avoidance and clinical benefits derived from a pharmacy-managed anemia program.                                                                                            |
| #384 | MEDLINE_EMBASE | Studies demonstrating improved outcomes in patients with asthma: A 10-year review.                                                                                              |
| #385 | MEDLINE_EMBASE | Expanding the roles of outpatient pharmacists: effects on health services utilisation, costs, and patient outcomes.                                                             |
| #386 | MEDLINE_EMBASE | The impact of managed care on pharmacy practice.                                                                                                                                |
| #387 | MEDLINE_EMBASE | The Medicare prescription drug benefit: how will the game be played?.                                                                                                           |
| #389 | MEDLINE_EMBASE | The timmins project: A study in managed care.                                                                                                                                   |
| #390 | MEDLINE_EMBASE | Improving pharmacy supply-chain management in the operating room.                                                                                                               |
| #391 | MEDLINE_EMBASE | As the debate over a Medicare drug benefit intensifies, the role of pharmacy benefit managers is in the spotlight.                                                              |
| #392 | MEDLINE_EMBASE | Cost-benefit analysis of a clinical pharmacist's presence on a post-liver transplant service (confessions of some accidental hermeneuticians).                                  |
| #393 | MEDLINE_EMBASE | Inadequate reimbursement for pharmacist cognitive services.                                                                                                                     |
| #394 | MEDLINE_EMBASE | Impact of pharmacists providing a prescription review and monitoring service in ambulatory care or community practice.                                                          |
| #395 | MEDLINE_EMBASE | Cost analysis of pharmacy-based aminoglycoside regimens: Once-daily vs. multiple daily dosing.                                                                                  |
| #396 | MEDLINE_EMBASE | Prescription drug use and seniors.                                                                                                                                              |
| #397 | MEDLINE_EMBASE | Improved phenytoin monitoring through pharmacist intervention.                                                                                                                  |
| #398 | MEDLINE_EMBASE | Economic and humanistic impact of adverse events associated with CSFs.                                                                                                          |
| #399 | MEDLINE_EMBASE | Drug of compassionate use: More responsibility for the hospital pharmacy services. [Spanish]                                                                                    |
| #400 | MEDLINE_EMBASE | Practical hospital pharmacy management: Drug distribution.                                                                                                                      |
| #401 | MEDLINE_EMBASE | Practical hospital pharmacy management: Management strategies and methods.                                                                                                      |
| #402 | MEDLINE_EMBASE | Uses and abuses of prescription drug information in pharmacy benefits management programs.                                                                                      |
| #403 | MEDLINE_EMBASE | Use of contingent valuation to place a monetary value on pharmacy services: An overview and review of the literature.                                                           |
| #404 | MEDLINE_EMBASE | Dollars and sense: a practical guide to cost analysis for hospital epidemiology and infection control.                                                                          |
| #405 | MEDLINE_EMBASE | Pharmaceutical care intervention documentation program and related cost savings at a University Hospital.                                                                       |
| #406 | MEDLINE_EMBASE | Managed care pharmacist: Trends in managed care pharmacy benefits.                                                                                                              |
| #407 | MEDLINE_EMBASE | Managed care pharmacist: National health care expenditures remain constant.                                                                                                     |
| #408 | MEDLINE_EMBASE | Kickbacks, courtesies or cost-effectiveness?: Application of the medicare antikickback law to the marketing and promotional practices of drug and medical device manufacturers. |
| #409 | MEDLINE_EMBASE | Economic evaluation of pharmacy services - Fact or fiction?                                                                                                                     |
| #410 | MEDLINE_EMBASE | Pharmacy benefit management companies: Dimensions of performance.                                                                                                               |
| #411 | MEDLINE_EMBASE | Interventions in antimicrobial therapy made by infectious diseases clinical pharmacy specialists.                                                                               |
| #412 | MEDLINE_EMBASE | Out patient management of venous thromboembolism.                                                                                                                               |
| #413 | MEDLINE_EMBASE | Ensuring a role in diabetes disease management programs.                                                                                                                        |
| #414 | MEDLINE_EMBASE | The potential for self-interested behavior by pharmaceutical manufacturers through vertical integration with pharmacy benefit managers: The need for a new regulatory approach. |
| #415 | MEDLINE_EMBASE | Impact of trauma stress ulcer prophylaxis guidelines on drug cost and frequency of major gastrointestinal bleeding.                                                             |
| #416 | MEDLINE_EMBASE | The effect of managed care on prescription drug costs and benefits.                                                                                                             |
| #417 | MEDLINE_EMBASE | Data-based pharmacy utilization review identifies those at-risk, improves care, cuts utilization.                                                                               |

|      |                |                                                                                                                                                                     |
|------|----------------|---------------------------------------------------------------------------------------------------------------------------------------------------------------------|
| #418 | MEDLINE_EMBASE | Experience with external review panels to validate a large clinical pharmacy intervention study.                                                                    |
| #419 | MEDLINE_EMBASE | Pharmacist-managed anticoagulation clinics: A review.                                                                                                               |
| #420 | MEDLINE_EMBASE | A review of the pharmacoeconomics of pharmaceutical care.                                                                                                           |
| #421 | MEDLINE_EMBASE | Patient consultation in a managed care setting: Guiding pharmacy into the future.                                                                                   |
| #422 | MEDLINE_EMBASE | Pharmaceutical care evaluated: The value of your services.                                                                                                          |
| #423 | MEDLINE_EMBASE | The effect of pharmacy benefit manager clinical programs and services on access to prescription drug benefit coverage.                                              |
| #424 | MEDLINE_EMBASE | Introduction to bioethics (8): The right to pharmacy service. [Spanish]                                                                                             |
| #425 | MEDLINE_EMBASE | The vertically integrated pharmacy department.                                                                                                                      |
| #426 | MEDLINE_EMBASE | Cost-effectiveness of clinical pharmacist intervention: An analysis of conscious sedation in the ICU.                                                               |
| #427 | MEDLINE_EMBASE | A collaborative approach to cost-containment in the surgical suite.                                                                                                 |
| #428 | MEDLINE_EMBASE | Integrating asthma management into pharmacy practice.                                                                                                               |
| #429 | MEDLINE_EMBASE | Overview of the hospital formulary systems in Hong Kong: Princess Margaret Hospital as a baseline.                                                                  |
| #430 | MEDLINE_EMBASE | Financial risk management of pharmacy benefits.                                                                                                                     |
| #431 | MEDLINE_EMBASE | Remaking the rules: Pharmacy reengineering opportunities and challenges in a small community hospital.                                                              |
| #432 | MEDLINE_EMBASE | Drug data debate.                                                                                                                                                   |
| #433 | MEDLINE_EMBASE | Nephrology pharmacy practice in the outpatient dialysis setting.                                                                                                    |
| #434 | MEDLINE_EMBASE | Managed care pharmacist. Pharmacotherapeutic algorithms: A new opportunity for pharmacists.                                                                         |
| #435 | MEDLINE_EMBASE | Pharmaceutical services in the Department of Veterans Affairs.                                                                                                      |
| #436 | MEDLINE_EMBASE | Providing pharmaceutical care in an ambulatory care pharmacy within an academic medical center.                                                                     |
| #437 | MEDLINE_EMBASE | The Iowa On-Line Prospective Drug Utilization Review (OPDUR) demonstration project: Study design, system design, and conceptual models.                             |
| #438 | MEDLINE_EMBASE | Lipid management: An opportunity for pharmacy service.                                                                                                              |
| #439 | MEDLINE_EMBASE | The role of pharmacoeconomics in disease management. A pharmaceutical benefit management company perspective.                                                       |
| #440 | MEDLINE_EMBASE | Pharmacist-managed primary care dermatology clinic.                                                                                                                 |
| #441 | MEDLINE_EMBASE | Decreasing liability potential in the hospital pharmacy.                                                                                                            |
| #442 | MEDLINE_EMBASE | The Clinical Pharmacy Services Study. A study of clinical services provided by pharmacists in Ontario Hospitals.                                                    |
| #443 | MEDLINE_EMBASE | Projecting future drug expenditures - 1996.                                                                                                                         |
| #444 | MEDLINE_EMBASE | Effectiveness of Pharmacy-Based Needle/Syringe Exchange Program for People Who Inject Drugs: A Systematic Review and Meta-analysis.                                 |
| #445 | MEDLINE_EMBASE | Cholesterol Point-of-Care Testing for Community Pharmacies: A Review of the Current Literature.                                                                     |
| #446 | MEDLINE_EMBASE | What is known about community pharmacy supply of naloxone? A scoping review.                                                                                        |
| #448 | MEDLINE_EMBASE | Pharmacist Interventions in the Management of Type 2 Diabetes Mellitus: A Systematic Review of Randomized Controlled Trials.                                        |
| #450 | MEDLINE_EMBASE | Institutional framework for integrated Pharmaceutical Benefits Management: results from a systematic review.                                                        |
| #451 | MEDLINE_EMBASE | Clinical pharmacy faculty interventions in a pediatric intensive care unit: an eight-month review.                                                                  |
| #452 | MEDLINE_EMBASE | Pharmacy interventions on prescribing in nursing homes: from evidence to practice.                                                                                  |
| #453 | MEDLINE_EMBASE | A review of countries' pharmacist-patient communication legal requirements on prescription medications and alignment with practice: Comparison of Nordic countries. |
| #454 | MEDLINE_EMBASE | Randomised evaluation of the Italian medicines use review provided by community pharmacists using asthma as a model (RE I-MUR).                                     |
| #455 | MEDLINE_EMBASE | Role of the Pharmacist in Medication Therapy Management Services in Patients With Osteoporosis.                                                                     |
| #457 | MEDLINE_EMBASE | Defining and advancing ambulatory care pharmacy practice: it is time to lengthen our stride.                                                                        |
| #458 | MEDLINE_EMBASE | [Cooperation between general practitioners and pharmacists: a systematic review]. [French]                                                                          |
| #459 | MEDLINE_EMBASE | An innovative off-campus infusion suite designed to improve experiences of patients with cancer.                                                                    |
| #460 | MEDLINE_EMBASE | [Assessment, frequency, causes, and prevention of medication errors - a critical analysis]. [German]                                                                |
| #461 | MEDLINE_EMBASE | A patient-centered pharmacy services model of HIV patient care in community pharmacy settings: a theoretical and empirical framework.                               |
| #462 | MEDLINE_EMBASE | Pharmacy benefit managers: evaluating clinical utility in the real world.                                                                                           |
| #463 | MEDLINE_EMBASE | The modeled lifetime cost-effectiveness of published adherence-improving interventions for antihypertensive and lipid-lowering medications.                         |
| #464 | MEDLINE_EMBASE | Managed care interventions for improving outcomes in acute heart failure syndromes.                                                                                 |
| #465 | MEDLINE_EMBASE | Iatrogenic disease management: moderating medication errors and risks in a pharmacy benefit management environment.                                                 |
| #466 | MEDLINE_EMBASE | Pharmacist's role in managing anemia in patients with chronic kidney disease: potential clinical and economic benefits.                                             |
| #467 | MEDLINE_EMBASE | Current trends in pharmacy benefit designs: a threat to disease management in chronic complex diseases.                                                             |

|      |                |                                                                                                                                            |
|------|----------------|--------------------------------------------------------------------------------------------------------------------------------------------|
| #468 | MEDLINE_EMBASE | Pharmaceutical care in community pharmacies: practice and research in Sweden.                                                              |
| #470 | MEDLINE_EMBASE | Cost of a pharmacist-directed intervention to increase treatment of hypercholesterolemia.                                                  |
| #471 | MEDLINE_EMBASE | Advances in postoperative pain management: the pharmacy perspective.                                                                       |
| #472 | MEDLINE_EMBASE | Pharmacist compensation for cognitive services: focus on the physician office and community pharmacy.                                      |
| #473 | MEDLINE_EMBASE | Role of the pharmacist in establishing lipid intervention programs.                                                                        |
| #475 | MEDLINE_EMBASE | Establishing value in managed care: cost-effectiveness or budgetary impact?                                                                |
| #476 | MEDLINE_EMBASE | The managed care pharmacy perspective.                                                                                                     |
| #477 | MEDLINE_EMBASE | Combined evidence-based literature analysis and consensus guidelines for stocking of emergency antidotes in the United States.             |
| #478 | MEDLINE_EMBASE | The impact of pharmaceutical services in community and ambulatory care settings: evidence and recommendations for future research.         |
| #479 | MEDLINE_EMBASE | Opportunities for depression disease management: a pharmacy benefit manager's experience.                                                  |
| #480 | MEDLINE_EMBASE | Programs promoting timely sequential antimicrobial therapy: an American perspective.                                                       |
| #481 | MEDLINE_EMBASE | Impact of managed care in pharmacy.                                                                                                        |
| #482 | MEDLINE_EMBASE | Pharmacoeconomics and therapeutic drug monitoring.                                                                                         |
| #485 | MEDLINE_EMBASE | Stress echocardiography.                                                                                                                   |
| #486 | MEDLINE_EMBASE | Pharmacists as agents of change for rational drug therapy.                                                                                 |
| #487 | MEDLINE_EMBASE | Pharmacist-managed medication review in a managed care system.                                                                             |
| #488 | MEDLINE_EMBASE | Projecting future drug expenditures--1994.                                                                                                 |
| #489 | MEDLINE_EMBASE | Use of therapeutic drug monitoring in pharmacoeconomics.                                                                                   |
| #490 | MEDLINE_EMBASE | 1993 Bibliography: a 32-year literature review on the value and acceptance of ambulatory care provided by pharmacists.                     |
| #491 | MEDLINE_EMBASE | Assessing the quality of pharmaceutical care. II. Application of concepts of quality assessment from medical care.                         |
| #492 | MEDLINE_EMBASE | Impact of pharmacist interventions on medication management by the elderly: a review of the literature.                                    |
| #493 | MEDLINE_EMBASE | Ambulatory care pharmacy services: the incomplete agenda.                                                                                  |
| #494 | MEDLINE_EMBASE | Postmarketing surveillance of adverse drug reactions: patient self-monitoring.                                                             |
| #495 | MEDLINE_EMBASE | Cefoxitin use review.                                                                                                                      |
| #496 | MEDLINE_EMBASE | Choices in prescription-drug benefit programs: mail versus community pharmacy services.                                                    |
| #497 | MEDLINE_EMBASE | Acceptance of pharmacists' suggestions by prescribers: a literature review.                                                                |
| #498 | MEDLINE_EMBASE | Ciprofloxacin drug utilization review and prospective drug use evaluation.                                                                 |
| #499 | MEDLINE_EMBASE | Management consultant review of three departments of pharmacy to identify cost-reduction opportunities.                                    |
| #500 | MEDLINE_EMBASE | Streamlining antimicrobial therapy through pharmacists' review of order sheets.                                                            |
| #501 | MEDLINE_EMBASE | Economic assessment of peptic ulcer disease treatments.                                                                                    |
| #502 | MEDLINE_EMBASE | A review of cost-benefit and cost-effectiveness analyses of clinical pharmacy services.                                                    |
| #503 | MEDLINE_EMBASE | Unresolved issues in the future of pharmacy.                                                                                               |
| #504 | MEDLINE_EMBASE | Monetary valuation of benefits of pharmacy services.                                                                                       |
| #505 | MEDLINE_EMBASE | An eleven-year review of the pharmacy literature: documentation of the value and acceptance of clinical pharmacy.                          |
| #506 | MEDLINE_EMBASE | Total formulary review--the easy way.                                                                                                      |
| #507 | MEDLINE_EMBASE | Controlling financial variables--changing prescribing patterns.                                                                            |
| #508 | MEDLINE_EMBASE | Reimbursement for nondistributive pharmaceutical services in hospitals.                                                                    |
| #509 | MEDLINE_EMBASE | A systematic review to assess adherence and persistence with statins.                                                                      |
| #510 | MEDLINE_EMBASE | Use of telemedicine to enhance pharmacist services in the nursing facility.                                                                |
| #511 | MEDLINE_EMBASE | Roles and impacts of pharmacist in oncology: A review of literature. [French]                                                              |
| #513 | MEDLINE_EMBASE | Interventions to improve adherence to lipid-lowering medication.                                                                           |
| #514 | MEDLINE_EMBASE | American College of Clinical Pharmacy 2016 Annual Meeting, ACCP 2016.                                                                      |
| #515 | MEDLINE_EMBASE | Clinical pharmacist impact in outpatient oncology practices: A systematic review.                                                          |
| #516 | MEDLINE_EMBASE | Deprescribing of medicines in care homes - Primary care pharmacists' practices and perspectives.                                           |
| #517 | MEDLINE_EMBASE | Risk factors for developing drug-related problems in patients with cardiovascular diseases attending Gondar University Hospital, Ethiopia. |
| #518 | MEDLINE_EMBASE | Impact of pharmaceutical care in vaccination: A review of literature.                                                                      |
| #519 | MEDLINE_EMBASE | Impact of pharmaceutical care in cancer: A review of literature.                                                                           |
| #520 | MEDLINE_EMBASE | A systematic review of the effect of cancer treatment on work productivity of patients and caregivers.                                     |
| #521 | MEDLINE_EMBASE | A systematic review on the role and impact of the clinical transplant pharmacist.                                                          |
| #522 | MEDLINE_EMBASE | Cost and dosage of biological therapies in clinical practice of rheumatic diseases.                                                        |

|      |                      |                                                                                                                                                                                                  |
|------|----------------------|--------------------------------------------------------------------------------------------------------------------------------------------------------------------------------------------------|
| #523 | MEDLINE_EMBASE       | A Review of US Drug Costs Relevant to Medicare, Medicaid, and Commercial Insurers Post-Affordable Care Act Enactment, 2010-2016.                                                                 |
| #525 | MEDLINE_EMBASE       | Economic evaluation of chronic disease self-management for people with diabetes: A systematic review.                                                                                            |
| #527 | MEDLINE_EMBASE       | Emergency hospital drug cabinet systems managed by hospital pharmacists and er physicians: A healthcare management model to reduce costs.                                                        |
| #528 | MEDLINE_EMBASE       | Pharmacist prescribing practices in a clinical pharmacy cardiac risk service.                                                                                                                    |
| #529 | MEDLINE_EMBASE       | Prescribing pharmacists in the ambulatory care setting: Experience at the University of North Carolina Medical Center.                                                                           |
| #530 | MEDLINE_EMBASE       | Elevating pharmacists' scope of practice through a health-system clinical privileging process.                                                                                                   |
| #531 | MEDLINE_EMBASE       | A metaanalysis of interventions to improve adherence to lipid-lowering medication.                                                                                                               |
| #532 | MEDLINE_EMBASE       | Big data: Implications for health system pharmacy.                                                                                                                                               |
| #533 | MEDLINE_EMBASE       | Community and hospital pharmaceutical care systematic review. Control cardiovascular risk in Spain and other countries. [Spanish]                                                                |
| #534 | MEDLINE_EMBASE       | Indicators in evaluating financial and economic performance of pharmacy: A systematic review.                                                                                                    |
| #536 | MEDLINE_EMBASE       | Adherence in pediatric kidney transplant recipients: solutions for the system.                                                                                                                   |
| #537 | MEDLINE_EMBASE       | Post discharge medicines use review (dMUR) service for older patients: Cost-savings from community pharmacist interventions.                                                                     |
| #539 | MEDLINE_EMBASE       | Economic Evaluation of Hospital and Community Pharmacy Services: A Review of the Literature (2010-2015).                                                                                         |
| #540 | MEDLINE_EMBASE       | Community pharmacy interventions for public health priorities: a systematic review of community pharmacy-delivered smoking, alcohol and weight management interventions.                         |
| #541 | MEDLINE_EMBASE       | A cluster randomised control trial to evaluate the effectiveness and cost-effectiveness of the Italian medicines use review (I-MUR) for asthma patients.                                         |
| #542 | MEDLINE_EMBASE       | Effectiveness of pharmacy-based needle/syringe exchange programme for people who inject drugs: a systematic review and meta-analysis.                                                            |
| #543 | MEDLINE_EMBASE       | Pharmacy Benefits Management in the Veterans Health Administration Revisited: A Decade of Advancements, 2004-2014.                                                                               |
| #545 | MEDLINE_EMBASE       | Management of multiple sclerosis and the integration of related specialty pharmacy programs within health systems.                                                                               |
| #546 | MEDLINE_EMBASE       | Specialty pharmacy for hematologic malignancies.                                                                                                                                                 |
| #547 | MEDLINE_EMBASE       | Adherence With Therapeutic Regimens: Behavioral and Pharmacoeconomic Perspectives.                                                                                                               |
| #548 | MEDLINE_EMBASE       | ECONOMIC ISSUES IN THERAPEUTIC DRUG MONITORING.                                                                                                                                                  |
| #550 | DARE_NHESEED_HT<br>A | Home care nursing.                                                                                                                                                                               |
| #551 | DARE_NHESEED_HT<br>A | Economic evaluation of enoxaparin for the prevention of venous thromboembolism in acutely ill medical patients.                                                                                  |
| #552 | DARE_NHESEED_HT<br>A | Peginterferon alfa-2a versus peginterferon alfa-2b as initial treatment of hepatitis C virus infection: a cost-utility analysis from the perspective of the Veterans Affairs health care system. |
| #554 | DARE_NHESEED_HT<br>A | The economics of a pharmacy-based central intravenous additive service for paediatric patients.                                                                                                  |
| #558 | DARE_NHESEED_HT<br>A | Hospital clinical pharmacy research in the UK: a review and annotated bibliography.                                                                                                              |
| #559 | DARE_NHESEED_HT<br>A | The impact of pharmacist interventions on health-related quality of life.                                                                                                                        |
| #560 | DARE_NHESEED_HT<br>A | Systematic review of the use of patients' own medications in acute care institutions.                                                                                                            |
| #561 | DARE_NHESEED_HT<br>A | Effectiveness of interventions by community pharmacists to improve patient adherence to chronic medication: a systematic review.                                                                 |
| #562 | DARE_NHESEED_HT<br>A | A cost-effectiveness analysis of a community pharmacist-based smoking cessation programme in Thailand.                                                                                           |
| #563 | DARE_NHESEED_HT<br>A | Cost-effectiveness of pharmacy and group behavioural support smoking cessation services in Glasgow.                                                                                              |
| #564 | DARE_NHESEED_HT<br>A | An estimation of the long-term clinical and economic benefits of insulin lispro in type 1 diabetes in the UK.                                                                                    |
| #565 | DARE_NHESEED_HT<br>A | The potency of team-based care interventions for hypertension: a meta-analysis.                                                                                                                  |
| #566 | DARE_NHESEED_HT<br>A | US Pharmacists' Effect as Team Members on Patient Care: Systematic Review and Meta-Analyses.                                                                                                     |
| #567 | DARE_NHESEED_HT<br>A | Effectiveness of pharmacist-participated warfarin therapy management: a systematic review and meta-analysis.                                                                                     |
| #568 | DARE_NHESEED_HT<br>A | Effect of pharmaceutical care programs on glycemic control in patients with diabetes mellitus: a meta-analysis of randomized controlled trials.                                                  |
| #570 | DARE_NHESEED_HT<br>A | One-year outcomes and a cost-effectiveness analysis for smokers accessing group-based and pharmacy-led cessation services.                                                                       |
| #571 | DARE_NHESEED_HT<br>A | Pyxis and medDISPENSE automated medication dispensing systems: a review of the clinical benefits and harms, cost-effectiveness, and guidelines for use.                                          |
| #573 | DARE_NHESEED_HT<br>A | Is Accelerated Partner Therapy (APT) a cost-effective alternative to routine patient referral partner notification in the UK? Preliminary cost-consequence analysis of an exploratory trial.     |
| #575 | DARE_NHESEED_HT<br>A | Interventions promoting adherence to cardiovascular medicines.                                                                                                                                   |

|      |                      |                                                                                                                                                                                                                    |
|------|----------------------|--------------------------------------------------------------------------------------------------------------------------------------------------------------------------------------------------------------------|
| #577 | DARE_NHESEED_HT<br>A | Pharmacist interventions to improve cardiovascular disease risk factors in diabetes: a systematic review and meta-analysis of randomized controlled trials.                                                        |
| #578 | DARE_NHESEED_HT<br>A | The impact of HIV clinical pharmacists on HIV treatment outcomes: a systematic review.                                                                                                                             |
| #580 | DARE_NHESEED_HT<br>A | Are pharmacy-based minor ailment schemes a substitute for other service providers? A systematic review.                                                                                                            |
| #581 | DARE_NHESEED_HT<br>A | Pharmacist services provided in general practice clinics: a systematic review and meta-analysis.                                                                                                                   |
| #584 | TUFTS                | Cost-effectiveness of statins for primary prevention in patients newly diagnosed with type 2 diabetes in the Netherlands.                                                                                          |
| #585 | TUFTS                | Feasibility and cost-effectiveness of stroke prevention through community screening for atrial fibrillation using iPhone ECG in pharmacies. The SEARCH-AF study.                                                   |
| #586 | TUFTS                | Economic evaluation of posaconazole versus fluconazole or itraconazole in the prevention of invasive fungal infection in high-risk neutropenic patients in Sweden.                                                 |
| #587 | TUFTS                | Improving adherence to lipid-lowering therapy in a community pharmacy intervention program: a cost-effectiveness analysis.                                                                                         |
| #588 | TUFTS                | Economic evaluation of acclidinium bromide in the management of moderate to severe COPD: an analysis over 5 years.                                                                                                 |
| #589 | TUFTS                | Evaluation of the cost-utility of insulin degludec vs insulin glargine in Sweden.                                                                                                                                  |
| #590 | TUFTS                | Cost-Effectiveness Analysis of Direct-Acting Antiviral Therapy for Treatment-Naive Patients With Chronic Hepatitis C Genotype 1 Infection in the Veterans Health Administration.                                   |
| #591 | TUFTS                | A UK Analysis of the Cost-Effectiveness of Humalog Mix75/25 and Mix50/50 Versus Long-Acting Basal Insulin.                                                                                                         |
| #592 | TUFTS                | The clinical and economic burden of poor adherence and persistence with osteoporosis medications in Ireland.                                                                                                       |
| #593 | TUFTS                | Long-term cost-utility analysis of exenatide once weekly versus insulin glargine for the treatment of type 2 diabetes patients in the US.                                                                          |
| #594 | TUFTS                | Health and economic outcomes for exenatide once weekly, insulin, and pioglitazone therapies in the treatment of type 2 diabetes: a simulation analysis.                                                            |
| #595 | TUFTS                | Cost-utility and budget impact analysis of primary prevention with alendronate of osteoporotic hip fractures in Catalonia.                                                                                         |
| #596 | TUFTS                | A long-term analysis evaluating the cost-effectiveness of biphasic insulin lispro mix 75/25 and mix 50/50 versus long-acting basal insulin analogs in the United States.                                           |
| #597 | TUFTS                | Incremental cost-effectiveness of the pre- and post-bevacizumab eras of metastatic colorectal cancer therapy in British Columbia, Canada.                                                                          |
| #598 | TUFTS                | Evaluating the cost-effectiveness of reduced mild hypoglycaemia in subjects with Type 1 diabetes treated with Insulin detemir or NPH insulin in Denmark, Sweden, Finland and the Netherlands.                      |
| #599 | TUFTS                | The clinical benefit and cost-effectiveness of human papillomavirus vaccination for adult women in the Netherlands.                                                                                                |
| #600 | TUFTS                | Cost-utility analysis of a pharmacy-led self-management programme for patients with COPD.                                                                                                                          |
| #601 | TUFTS                | Cost-effectiveness of exenatide versus insulin glargine in Spanish patients with obesity and type 2 diabetes mellitus.                                                                                             |
| #602 | TUFTS                | Incremental cost-effectiveness of various monthly doses of vardenafil.                                                                                                                                             |
| #603 | TUFTS                | Cost-effectiveness analysis of tapentadol immediate release for the treatment of acute pain.                                                                                                                       |
| #604 | TUFTS                | The cost effectiveness of rapid-acting insulin aspart compared with human insulin in type 2 diabetes patients: an analysis from the Japanese third-party payer perspective.                                        |
| #606 | TUFTS                | Cost-effectiveness analysis of a rural telemedicine collaborative care intervention for depression.                                                                                                                |
| #607 | TUFTS                | A cost-effectiveness analysis to illustrate the impact of cost definitions on results, interpretations and comparability of pharmacoeconomic studies in the US.                                                    |
| #608 | TUFTS                | Is INTERdisciplinary COMmunity-based COPD management (INTERCOM) cost-effective?                                                                                                                                    |
| #609 | TUFTS                | Cost-effectiveness of aliskiren in type 2 diabetes, hypertension, and albuminuria.                                                                                                                                 |
| #610 | TUFTS                | Short-Term Cost and Health Consequences of Duodenal Levodopa Infusion in Advanced Parkinson's Disease in Sweden: An Exploratory Study.                                                                             |
| #612 | TUFTS                | Cost-effectiveness of switching to biphasic insulin aspart in poorly-controlled type 2 diabetes patients in China.                                                                                                 |
| #613 | TUFTS                | Combination polypharmacy for cardiovascular disease prevention in men: a decision analysis and cost-effectiveness model.                                                                                           |
| #614 | TUFTS                | Cost-effectiveness of intensified versus conventional multifactorial intervention in type 2 diabetes: results and projections from the Steno-2 study.                                                              |
| #615 | TUFTS                | Economic evaluation of standing order programs for pneumococcal vaccination of hospitalized elderly patients.                                                                                                      |
| #616 | TUFTS                | Home-based medication review in older people: is it cost effective?                                                                                                                                                |
| #617 | TUFTS                | Exenatide versus insulin glargine in patients with type 2 diabetes in the UK: a model of long-term clinical and cost outcomes.                                                                                     |
| #618 | TUFTS                | Therapy conversion to insulin detemir among patients with type 2 diabetes treated with oral agents: a modeling study of cost-effectiveness in the United States.                                                   |
| #619 | TUFTS                | Cost-effectiveness of the two-compound formulation calcipotriol and betamethasone dipropionate compared with commonly used topical treatments in the management of moderately severe plaque psoriasis in Scotland. |
| #620 | TUFTS                | Cost-effectiveness of low-molecular-weight heparin for secondary prophylaxis of cancer-related venous thromboembolism.                                                                                             |

|      |       |                                                                                                                                                                                     |
|------|-------|-------------------------------------------------------------------------------------------------------------------------------------------------------------------------------------|
| #621 | TUFTS | Cost-effectiveness of topiramate in migraine prevention: results from a pharmacoeconomic model of topiramate treatment.                                                             |
| #622 | TUFTS | Cost-effectiveness of low-molecular-weight heparin for treatment of pulmonary embolism.                                                                                             |
| #623 | TUFTS | Prevention with tamoxifen or other hormones versus prophylactic surgery in BRCA1/2-positive women: a decision analysis.                                                             |
| #624 | TUFTS | Low-molecular-weight heparins compared with unfractionated heparin for treatment of acute deep venous thrombosis. A cost-effectiveness analysis.                                    |
| #625 | TUFTS | A pharmacoeconomic model to aid in the allocation of ambulatory clinical pharmacy services.                                                                                         |
| #626 | TUFTS | Cost-utility analysis of a multidisciplinary strategy to manage osteoarthritis of the knee: economic evaluation of a cluster randomized controlled trial study.                     |
| #627 | TUFTS | Cost effectiveness of a pharmacist-led information technology intervention for reducing rates of clinically important errors in medicines management in general practices (PINCER). |
| #628 | TUFTS | Cost-utility analysis of a pharmacotherapy follow-up for elderly nursing home residents in Spain.                                                                                   |
| #629 | TUFTS | Incremental cost effectiveness of pharmacist-managed erythropoiesis-stimulating agent clinics for non-dialysis-dependent chronic kidney disease patients.                           |
| #630 | TUFTS | Cost-effectiveness of pharmacist-participated warfarin therapy management in Thailand.                                                                                              |
| #631 | TUFTS | Cost-effectiveness of a community pharmacist intervention in patients with depression: a randomized controlled trial (PRODEFAR Study).                                              |
| #632 | TUFTS | A multidisciplinary support programme increases the efficiency of pegylated interferon alfa-2a and ribavirin in hepatitis C.                                                        |
| #633 | TUFTS | Cost-Effectiveness of a Community Pharmacist-Led Sleep Apnea Screening Program - A Markov Model.                                                                                    |
| #634 | TUFTS | A Markov model of the cost-effectiveness of pharmacist care for diabetes in prevention of cardiovascular diseases: evidence from Kaiser Permanente Northern California.             |
| #635 | TUFTS | Health economic evaluation of the Lund Integrated Medicines Management Model (LIMM) in elderly patients admitted to hospital.                                                       |
| #636 | TUFTS | Cost-effectiveness of pharmacist-provided treatment of adult pharyngitis.                                                                                                           |
| #637 | TUFTS | A cost-effectiveness analysis of an in-hospital clinical pharmacist service.                                                                                                        |
| #638 | TUFTS | Model-based cost-effectiveness analysis of interventions aimed at preventing medication error at hospital admission (medicines reconciliation).                                     |
| #639 | TUFTS | Economic analysis of albumin-bound paclitaxel for the treatment of metastatic breast cancer.                                                                                        |
| #640 | TUFTS | The cost effectiveness of anticoagulation management services for patients with atrial fibrillation and at high risk of stroke in the US.                                           |
| #641 | TUFTS | Cost analysis and cost-benefit analysis of a medication review with follow-up service in aged polypharmacy patients.                                                                |
| #642 | TUFTS | Massachusetts Health Reform Cost Less and Was More Effective for Uninsured Individuals With Venous Thromboembolism: A Cost-Effectiveness Analysis.                                  |
| #643 | TUFTS | Cost-effectiveness of adding carfilzomib to lenalidomide and dexamethasone in relapsed multiple myeloma from a US perspective.                                                      |
| #644 | TUFTS | Cost-Effectiveness Analysis of Incretin Therapy for Type 2 Diabetes in Spain: 1.8 mg Liraglutide Versus Sitagliptin.                                                                |
| #645 | TUFTS | Cost-utility analysis of a medication review with follow-up service for older adults with polypharmacy in community pharmacies in Spain: the conSIGUE program.                      |
| #646 | TUFTS | The four or more medicines (FOMM) support service: results from an evaluation of a new community pharmacy service aimed at over-65s.                                                |
| #647 | TUFTS | Cost-effectiveness of Collaborative Care for Depression in Human Immunodeficiency Virus Clinics.                                                                                    |
| #648 | TUFTS | Cost-Effectiveness Analysis of Treating Acute Promyelocytic Leukemia Patients With Arsenic Trioxide and Retinoic Acid in the United States.                                         |
| #649 | TUFTS | Chronic obstructive pulmonary disease case finding by community pharmacists: a potential cost-effective public health intervention.                                                 |
| #650 | TUFTS | Economic analysis of insulin initiation by pharmacists in a Canadian setting: The RxING study.                                                                                      |
| #651 | TUFTS | Economic evaluation of a pharmaceutical care program for elderly diabetic and hypertensive patients in primary health care: a 36-month randomized controlled clinical trial.        |
| #652 | TUFTS | Cost-effectiveness analysis of smoking-cessation counseling training for physicians and pharmacists.                                                                                |
| #653 | TUFTS | Care in the Home for the Management of Chronic Heart Failure: Systematic Review and Cost-Effectiveness Analysis.                                                                    |
| #654 | TUFTS | Pharmacist-led management of chronic pain in primary care: costs and benefits in a pilot randomised controlled trial.                                                               |
| #655 | CDSR  | Interventions to improve adherence to inhaled steroids for asthma.                                                                                                                  |
| #656 | CDSR  | Pharmacological interventions for non-alcohol related fatty liver disease (NAFLD).                                                                                                  |
| #657 | CDSR  | Interventions to improve inhaler technique for people with asthma.                                                                                                                  |
| #658 | CDSR  | Fixed-dose combination therapy for the prevention of atherosclerotic cardiovascular diseases.                                                                                       |
| #659 | CDSR  | Interventions to improve antibiotic prescribing practices for hospital inpatients.                                                                                                  |
| #660 | CDSR  | Training interventions for improving telephone consultation skills in clinicians.                                                                                                   |
| #662 | CDSR  | Automated telephone communication systems for preventive healthcare and management of long-term conditions.                                                                         |
| #663 | CDSR  | Non-medical prescribing versus medical prescribing for acute and chronic disease management in primary and secondary care.                                                          |

|      |      |                                                                                                                                          |
|------|------|------------------------------------------------------------------------------------------------------------------------------------------|
| #664 | CDSR | Tools developed and disseminated by guideline producers to promote the uptake of their guidelines.                                       |
| #665 | CDSR | Public stewardship of private for-profit healthcare providers in low- and middle-income countries.                                       |
| #666 | CDSR | Home telemonitoring and remote feedback between clinic visits for asthma.                                                                |
| #667 | CDSR | Remote versus face-to-face check-ups for asthma.                                                                                         |
| #668 | CDSR | Organising healthcare services for persons with an intellectual disability.                                                              |
| #669 | CDSR | Medication review in hospitalised patients to reduce morbidity and mortality.                                                            |
| #670 | CDSR | Interventions to optimise prescribing for older people in care homes.                                                                    |
| #671 | CDSR | Interventions for dysphagia in long-term, progressive muscle disease.                                                                    |
| #672 | CDSR | Interventions for preventing unintended pregnancies among adolescents.                                                                   |
| #673 | CDSR | Systematic versus opportunistic risk assessment for the primary prevention of cardiovascular disease.                                    |
| #674 | CDSR | Discharge planning from hospital.                                                                                                        |
| #675 | CDSR | Interactive telemedicine.                                                                                                                |
| #676 | CDSR | Patient controlled opioid analgesia versus non-patient controlled opioid analgesia for postoperative pain.                               |
| #677 | CDSR | Chronic disease management programmes for adults with asthma.                                                                            |
| #678 | CDSR | Negative pressure wound therapy for treating pressure ulcers.                                                                            |
| #679 | CDSR | Interventions for hirsutism (excluding laser and photoepilation therapy alone).                                                          |
| #680 | CDSR | Strategies to increase the ownership and use of insecticide-treated bednets to prevent malaria.                                          |
| #681 | CDSR | Interventions for reducing medication errors in children in hospital.                                                                    |
| #682 | CDSR | Interventions to reduce waiting times for elective procedures.                                                                           |
| #683 | CDSR | Low dose versus high dose stavudine for treating people with HIV infection.                                                              |
| #684 | CDSR | Interventions for enhancing medication adherence.                                                                                        |
| #685 | CDSR | Antibiotic prophylaxis versus no prophylaxis for preventing infection after cesarean section.                                            |
| #686 | CDSR | Interventions for managing asthma in pregnancy.                                                                                          |
| #687 | CDSR | Interventions to improve the appropriate use of polypharmacy for older people.                                                           |
| #688 | CDSR | Interventions for improving the adoption of shared decision making by healthcare professionals.                                          |
| #689 | CDSR | Systemic safety of bevacizumab versus ranibizumab for neovascular age-related macular degeneration.                                      |
| #690 | CDSR | Dental auxiliaries for dental care traditionally provided by dentists.                                                                   |
| #691 | CDSR | Exit interviews to reduce turnover amongst healthcare professionals.                                                                     |
| #692 | CDSR | Intravenous magnesium sulfate for treating adults with acute asthma in the emergency department.                                         |
| #693 | CDSR | Interventions to improve safe and effective medicines use by consumers.                                                                  |
| #694 | CDSR | Antidepressants for smoking cessation.                                                                                                   |
| #695 | CDSR | Computerized advice on drug dosage to improve prescribing practice.                                                                      |
| #696 | CDSR | The effect of different methods of remuneration on the behaviour of primary care dentists.                                               |
| #697 | CDSR | Collaborative care approaches for people with severe mental illness.                                                                     |
| #698 | CDSR | Integrated disease management interventions for patients with chronic obstructive pulmonary disease.                                     |
| #699 | CDSR | Telephone counselling for smoking cessation.                                                                                             |
| #700 | CDSR | Interventions for implementation of thromboprophylaxis in hospitalized medical and surgical patients at risk for venous thromboembolism. |
| #701 | CDSR | Effectiveness and cost-effectiveness of home palliative care services for adults with advanced illness and their caregivers.             |
| #702 | CDSR | Interventions to improve professional adherence to guidelines for prevention of device-related infections.                               |
| #704 | CDSR | Interventions for preventing falls in older people in care facilities and hospitals.                                                     |
| #705 | CDSR | Primary care professionals providing non-urgent care in hospital emergency departments.                                                  |
| #706 | CDSR | Information provision for stroke patients and their caregivers.                                                                          |
| #707 | CDSR | Printed educational materials.                                                                                                           |
| #708 | CDSR | Collaborative care for depression and anxiety problems.                                                                                  |
| #709 | CDSR | Clinical service organisation for heart failure.                                                                                         |
| #710 | CDSR | Interventions for preventing falls in older people living in the community.                                                              |
| #711 | CDSR | Interventions for smoking cessation in hospitalised patients.                                                                            |
| #712 | CDSR | Training health professionals in smoking cessation.                                                                                      |
| #713 | CDSR | Interventions for treating oral mucositis for patients with cancer receiving treatment.                                                  |
| #714 | CDSR | Effect of outpatient pharmacists' non-dispensing roles on patient outcomes and prescribing patterns.                                     |
| #715 | CDSR | Interventions used to improve control of blood pressure in patients with hypertension.                                                   |

|      |      |                                                                                                                                                                          |
|------|------|--------------------------------------------------------------------------------------------------------------------------------------------------------------------------|
| #716 | CDSR | Service organisation for the secondary prevention of ischaemic heart disease in primary care.                                                                            |
| #717 | CDSR | Antibiotic prophylaxis to reduce respiratory tract infections and mortality in adults receiving intensive care.                                                          |
| #718 | CDSR | Individual patient education for people with type 2 diabetes mellitus.                                                                                                   |
| #719 | CDSR | Interventions for improving older patients' involvement in primary care episodes.                                                                                        |
| #720 | CDSR | Telephone follow-up, initiated by a hospital-based health professional, for postdischarge problems in patients discharged from hospital to home.                         |
| #721 | CDSR | Community pharmacy personnel interventions for smoking cessation.                                                                                                        |
| #726 | WoS  | Clinical medication review in Australia: A systematic review.                                                                                                            |
| #729 | WoS  | Community pharmacies as sites of adult vaccination: A systematic review.                                                                                                 |
| #731 | WoS  | The impact of patient support programs on adherence, clinical, humanistic, and economic patient outcomes: a targeted systematic review.                                  |
| #732 | WoS  | A Systematic Review of Interventions Addressing Adherence to Anti-Diabetic Medications in Patients with Type 2 Diabetes-Components of Interventions.                     |
| #733 | WoS  | Emergence of BCR-ABL Kinase Domain Mutations Associated with Newly Diagnosed Chronic Myeloid Leukemia: A Meta-Analysis of Clinical Trials of Tyrosine Kinase Inhibitors. |
| #735 | WoS  | Meta-analysis of the effectiveness of smoking cessation interventions in community pharmacy.                                                                             |
| #738 | WoS  | Effectiveness of tobacco use cessation interventions delivered by pharmacy personnel: A systematic review.                                                               |
| #739 | WoS  | Interventions to improve osteoporosis medication adherence and persistence: a systematic review and literature appraisal by the ISPOR.                                   |
| #741 | WoS  | Information technology interventions to improve medication safety in primary care: a systematic review.                                                                  |
| #742 | WoS  | Approaches for improving continuity of care in medication management: a systematic review.                                                                               |
| #746 | WoS  | Cooperation between general practitioners and pharmacists: a systematic review.                                                                                          |
| #747 | WoS  | Chlamydia screening interventions from community pharmacies: a systematic review.                                                                                        |
| #748 | WoS  | Chlamydia screening in community pharmacies: a systematic literature review of the characteristics of service users and a meta-analysis of chlamydia prevalence.         |
| #750 | WoS  | Pharmacists' interventions in the management of patients with chronic kidney disease: a systematic review.                                                               |
| #752 | WoS  | Pharmacist interventions to enhance blood pressure control and adherence to antihypertensive therapy: Review and meta-analysis.                                          |
| #756 | WoS  | The methodological quality of economic evaluations of guideline implementation into clinical practice: A systematic review of empiric studies.                           |
| #757 | WoS  | Pharmacists versus nonpharmacists in adverse drug event detection: A meta-analysis and systematic review.                                                                |
| #758 | WoS  | Collaborative care for depression in primary care - Making sense of a complex intervention: systematic review and meta-regression.                                       |
| #759 | WoS  | Clinical pharmacists and inpatient medical care - A systematic review.                                                                                                   |
